# Supplementary material
Source: ML conference proceedings conference paper supplement (https://openreview.net/forum?id=BI031mw7iS)
Supplement: supplementary_material [file attachment]

## 504 A Limitations, Future Work, and Broader Impact

505 Learning on naturally heterogeneous datasets can be challenging, as the true data distributions of individual  
506 clients are unknown, making it difficult to correlate the divergence between client data distribution and the  
507 global data distribution with routing policy decisions. In our approach, we estimate the distribution divergence  
508 by measuring the difference between inference losses on global and local models, which helps us reason about  
509 routing probabilities for global and local routes. To further improve our understanding of the model performance,  
510 we plan to propose a metric that quantifies the difference in performance when a particular dataset is included  
511 versus excluded.

512 *Flow* has shown the promise of per-instance personalization in improving clients’ accuracy. This approach also  
513 holds the potential of preserving privacy by protecting against gradient leakage [38–40] and membership infer-  
514 ence [41, 42] attacks that are easier to carry out in vanilla FL. Studying the relationship between personalization  
515 and privacy, and comparing our approach to traditional methods like Differential Privacy (DP) [43, 44] can  
516 reveal properties of personalization that go beyond improved accuracy.

## 517 B Datasets and Hyperparameters

518 **Stackoverflow** The Stackoverflow dataset [30] is comprised of separate clients designated for training,  
519 validation, and testing. The dataset contains a total of 342,477 train clients, whose combined sample count equals  
520 135,818,730. Similarly, the dataset contains 38,758 validation and 204,088 test clients, whose combined sample  
521 counts equal 16,491,230 and 16,586,035, respectively. This dataset is naturally heterogeneous [45] since each  
522 user of Stackoverflow represents a client, with their posts forming the dataset for that client. The heterogeneity  
523 of the dataset arises from the fact that users have different writing styles, meaning the clients’ datasets are not  
524 i.i.d., and the total number of posts from each user varies, leading to different dataset sizes per client.

525 We have trained *Flow* and its baselines on the Stackoverflow dataset for 2000 rounds. The one layer LSTM we  
526 have used has 96 as embedding dimension, 670 as hidden state size, and 20 as the maximum sequence length  
527 [19]. The batch size used for each client on each baseline is 16. The vocabulary of this language task is limited  
528 to 10k most frequent tokens. The default learning rate used is 0.1. The number of clients per round is set to 10,  
529 as is the common practice in [14, 46, 13, 10, 47]. For client-side training, the default epoch count is 3 for all the  
530 algorithms.

531 For KNNPER, we used 5 nearby neighbors, and the mixture parameter is  $\lambda = 0.5$ . For APFL, mixture  
532 hyperparameter  $\alpha$  is set to 0.25. DITTO has regularization hyperparameter  $\lambda = 0.1$ . There are 2 clusters  
533 by default for HYPCLUSTER. *Flow* and its variants were tested on the following choices of regularizing  
534 hyperparameters  $\gamma \in \{1e-1, 1e-2, 1e-3, 1e-4\}$ , where 1e-3 gave the best personalized accuracy.

535 **Shakespeare** The Shakespeare dataset [31] consists of 715 distinct clients, each of which has its own training,  
536 validation, and test datasets. The combined training datasets of all clients contain a total of 12,854 instances,  
537 while the combined validation and test datasets contain 3,214 and 2,356 instances, respectively. The Shakespeare  
538 dataset is considered heterogeneous due to the fact that each client is a play written by William Shakespeare, and  
539 these plays have varying settings and characters.

540 All the baselines and *Flow* variants have been run for 1500 rounds, with 10 clients per round. The 2 layer LSTM  
541 used [19] has 8 as embedding size, vocabulary size of 90 most frequently used characters, and 256 as hidden  
542 size. The default epoch count is 5 for each client, for each algorithm. The batch size is 4 since bigger batch sizes  
543 resulted in the divergence of the global model across all the different runs. The default learning rate is 0.1.

544 Since each client has a sample count under 20, we have used 3 as the nearest neighbor sample count for KNNPER.  
545  $\lambda$  and  $\alpha$ , the mixture parameters, for KNNPER and APFL respectively, are set to 0.45 and 0.3. The regularization  
546 parameter  $\lambda$  for DITTO is set to 0.1. For *Flow*, the learning rate is set to 0.11 and the regularization parameter is  
547 picked from  $\gamma \in \{1e-1, 1e-2, \mathbf{1e-3}, 1e-4\}$  similar to Stackoverflow.

548 **EMNIST** The EMNIST dataset [32] comprises 3400 distinct clients, each of which has its own training,  
549 validation, and test datasets. The combined total number of instances in the train datasets of all clients is 671,585,  
550 whereas the validation and test datasets of all clients combined contain 77,483 instances each. The heterogeneity  
551 of EMNIST clients is due to the individual writing styles of each client, with each client representing a single  
552 person. This is discussed in Appendix C.2 of [19].

553 The default round count for all the baselines and *Flow* variants is 1500, with 10 clients participating per round.  
554 Similar to AFO [19], we have used a shallow convolution neural network with 2 convolution layers. Each client  
555 uses 3 local epochs for on-device training. The default batch size is 20, and the default learning rate is 0.01.

556 For LOCAL only training, we have used 10 epochs per client with a learning rate of 0.05. The nearest sample  
557 count for KNNPER is 10 and the mixture parameter is  $\lambda = 0.4$ . For APFL, we have the default mixture parameter  
558 as  $\alpha = 0.25$ . DITTO has regularization hyperparameter as  $\lambda = 0.1$ . There are 2 clusters for the clustering

559 algorithm HYPCLUSTER. And for *Flow*, along with its variants, we have picked  $\gamma \in \{1e-1, \mathbf{1e-2}, 1e-3, 1e-4\}$  as  
 560 the regularizing hyperparameter.

561 **CIFAR10** The CIFAR10 dataset is derived from the centralized version of the CIFAR10 dataset [33],  
 562 which comprises 50,000 images. The federated CIFAR10 dataset consists of 500 unique clients, each of  
 563 which has 100 training samples and 20 testing samples. The training and testing samples for each client are  
 564 determined according to the Dirichlet distribution [19]. The heterogeneity of a client is determined by the  
 565 Dirichlet distribution parameter  $\alpha \in [0, 1]$ , where a client is more heterogeneous than  $\alpha \rightarrow 0$ . In this context,  
 566 heterogeneity refers to the dissimilarity of the dataset instances sampled from a distribution. We conducted  
 567 experiments on clients with  $\alpha$  values of 0.1 and 0.6.

568 We ran all the experiments for 4000 rounds for the CIFAR10 dataset. ResNet18 [34] is used for all the algorithms.  
 569 The default batch size is 20 and the default learning rate is 0.05. Each client individually trains their local  
 570 versions of the global model for 3 epochs.

571 For LOCAL only training, 20 epochs per client were used. The learning rate was 0.1 for the same. The nearest  
 572 sample count and the mixture hyperparameter for KNNPER are set to 5 and 0.5. PARTIALFED learning rate is set  
 573 to 0.11, with the local epoch count is 5. APFL has mixture hyperparameter set as  $\alpha = 0.2$ . And DITTO has a  
 574 regularization hyperparameter set as  $\lambda = 0.01$ . *Flow* and its variants have their regularization hyperparameter as  
 575  $\gamma \in \{1e-1, 1e-2, \mathbf{1e-3}, 1e-4\}$ .

576 **CIFAR100** Like CIFAR10, the CIFAR100 dataset [48] is derived from the CIFAR100 dataset [33] consisting  
 577 of 50,000 images. The number of clients and the count of training and testing images are identical to those of  
 578 CIFAR10. Similarly, we also conducted experiments with the Dirichlet parameter set to  $\alpha = 0.1$  and  $\alpha = 0.6$ .

579 Similar to CIFAR10, we have a 4000 round count for all the algorithms ran on the CIFAR100 dataset. We have  
 580 again used ResNet18 [34]. The default local epoch count is 3, and the default learning rate is 0.05. We have  
 581 used 20 batch size for all the algorithms. For each round, 10 clients participate as is the norm stated in the  
 582 Stackoverflow dataset description.

583 LOCAL only training has 20 epochs per client, and 0.1 learning rate. 5 nearest samples are used for KNNPER,  
 584 while the mixture parameter  $\lambda$  is set to 0.4. PARTIALFED, just like in CIFAR10, has 0.11 learning rate and 5  
 585 local epochs per client. APFL has 0.25 as mixture parameter  $\alpha$ . DITTO has 1e-2 as regularization parameter  
 586  $\lambda$ . For both CIFAR10 and CIFAR100, we have 2 as the default cluster count for HYPCLUSTER. *Flow* and its  
 587 variants get  $\{1e-1, 1e-2, \mathbf{1e-3}, 1e-4\}$  as the regularization hyperparameter  $\gamma$ .

## 588 C Additional Results

### 589 C.1 Generalized and Personalized Accuracy

590 Generalized (Personalized) accuracy is calculated based on the global (personalized) model, where each  
 591 participating client’s test dataset is used to compute accuracy of the global (personalized) model.

592 Generalized accuracy is formulated as

$$Acc_g = \frac{1}{M} \sum_{m \in [M]} \frac{\sum_{(x,y) \in \mathcal{S}_m^{\text{test}}} \mathbb{1}\{y = w_g(x)\}}{\mathcal{S}_m^{\text{test}}}. \quad (6)$$

593 Personalized accuracy is formulated as

$$Acc_p = \frac{1}{M} \sum_{m \in [M]} \frac{\sum_{(x,y) \in \mathcal{S}_m^{\text{test}}} \mathbb{1}\{y = w_{p,m}(x)\}}{\mathcal{S}_m^{\text{test}}}. \quad (7)$$

594 We have reported Generalized (Personalized) Accuracy  $Acc_g$  ( $Acc_p$ ) of *Flow*, averaged across 1000 clients in  
 595 Table 4, for all the datasets. Similarly, variance of accuracies across 3 different runs (based on seeds 0, 44, 56) is  
 596 reported in Table 5.

597 *Flow* sees an improvement of 1.11-3.46% in  $Acc_g$  and 1.33-4.58% in  $Acc_p$  over the best performing baseline.  
 598 Besides the main observations listed in Section 5, we discuss results on the CIFAR100 dataset here. For  
 599 CIFAR100 (0.6), *Flow* ( $40.08\% \pm 0.27\%$ ) matches the personalized accuracy of the highest performing baseline,  
 600 PARTIALFED ( $40.18\% \pm 0.19\%$ ), while achieving 1.98% point increase in generalized accuracy. And for  
 601 CIFAR100 (0.1), *Flow* improves personalized accuracy by 1.78% points. For generalized accuracy, *Flow*  
 602 ( $34.00\% \pm 0.32\%$ ) reaches close to the best performing baseline, PARTIALFED ( $34.79\% \pm 0.29\%$ ). The reason  
 603 behind the on-par performance of *Flow* with PARTIALFED can be attributed to the statefulness of PARTIALFED.  
 604 With the assumption of full device participation, PARTIALFED makes use of each client’s previous state of  
 605 the personalized model to further train its layer-wise model building policy. With *Flow*, both the assumptions  
 606 of full device participation and statefulness of the personalized model are not necessary. Since the clients do

Table 4: Generalized ( $Acc_g$ ) and Personalized ( $Acc_p$ ) accuracy (the higher, the better) for *Flow* and baselines. Variance across different runs is reported in Appendix C, Table 5.

| Datasets           | Stackoverflow |               | Shakespeare   |               | EMNIST        |               | CIFAR10 (0.1) |               | CIFAR100 (0.1) |               | CIFAR10 (0.6) |               | CIFAR100 (0.6) |               |
|--------------------|---------------|---------------|---------------|---------------|---------------|---------------|---------------|---------------|----------------|---------------|---------------|---------------|----------------|---------------|
| Baselines          | $Acc_g$       | $Acc_p$       | $Acc_g$       | $Acc_p$       | $Acc_g$       | $Acc_p$       | $Acc_g$       | $Acc_p$       | $Acc_g$        | $Acc_p$       | $Acc_g$       | $Acc_p$       | $Acc_g$        | $Acc_p$       |
| LOCAL              | -             | 15.93%        | -             | 18.70%        | -             | 28.18%        | -             | 49.78%        | -              | 36.19%        | -             | 62.74%        | -              | 21.31%        |
| FEDAVG             | 23.15%        | -             | 52.00%        | -             | 85.10%        | -             | 60.98%        | -             | 28.11%         | -             | 67.50%        | -             | 30.33%         | -             |
| FEDAVGFT           | 23.83%        | 24.41%        | 52.12%        | 53.68%        | 89.57%        | 90.14%        | 61.23%        | 73.03%        | 29.60%         | 31.02%        | 68.19%        | 72.21%        | 31.15%         | 37.24%        |
| KNNPER             | 23.16%        | 24.49%        | 51.87%        | 53.10%        | 85.20%        | 88.28%        | 59.62%        | 75.14%        | 28.08%         | 33.62%        | 69.22%        | 70.14%        | 30.66%         | 34.39%        |
| PARTIALFED         | -             | -             | -             | -             | -             | -             | 62.57%        | 73.20%        | <b>34.79%</b>  | 40.64%        | 66.93%        | 70.38%        | 37.72%         | <b>40.18%</b> |
| APFL               | 22.96%        | 25.70%        | 52.38%        | 53.64%        | 88.40%        | 89.44%        | 62.87%        | 72.86%        | 31.05%         | 32.56%        | 69.53%        | 72.53%        | 36.37%         | 36.74%        |
| DITTO              | 22.59%        | 24.36%        | 52.44%        | 53.95%        | 89.08%        | 91.30%        | 62.06%        | 72.06%        | 28.14%         | 35.45%        | 68.12%        | 70.31%        | 35.11%         | 36.07%        |
| FEDREP             | 18.92%        | 21.04%        | 46.71%        | 50.09%        | 89.95%        | 89.77%        | 64.85%        | 68.62%        | 26.10%         | 33.72%        | 69.77%        | 63.61%        | 28.42%         | 31.02%        |
| LG FEDAVG          | 22.61%        | 24.03%        | 51.08%        | 51.43%        | 87.43%        | 91.70%        | 56.63%        | 73.19%        | 31.65%         | 39.63%        | 67.48%        | 68.94%        | 35.01%         | 33.90%        |
| HYPCLUSTER         | 23.75%        | 22.43%        | 51.92%        | 52.74%        | 89.47%        | 90.49%        | 63.64%        | 71.55%        | 31.57%         | 33.04%        | 65.44%        | 72.40%        | 34.76%         | 36.22%        |
| <i>Flow</i> (Ours) | <b>26.64%</b> | <b>29.49%</b> | <b>55.90%</b> | <b>56.20%</b> | <b>90.88%</b> | <b>94.18%</b> | <b>66.26%</b> | <b>76.47%</b> | 34.00%         | <b>42.42%</b> | <b>70.88%</b> | <b>77.11%</b> | <b>39.70%</b>  | 40.08%        |

Table 5: Variance of generalized and personalized accuracies across 3 different runs (seeds = 0, 44, 56) for *Flow* and its baselines.

| Datasets    | SO NWP  |         | Shakespeare |         | EMNIST  |         | CIFAR10 (0.1) |         | CIFAR100 (0.1) |         | CIFAR10 (0.6) |         | CIFAR100 (0.6) |         |
|-------------|---------|---------|-------------|---------|---------|---------|---------------|---------|----------------|---------|---------------|---------|----------------|---------|
| Baselines   | $Acc_g$ | $Acc_p$ | $Acc_g$     | $Acc_p$ | $Acc_g$ | $Acc_p$ | $Acc_g$       | $Acc_p$ | $Acc_g$        | $Acc_p$ | $Acc_g$       | $Acc_p$ | $Acc_g$        | $Acc_p$ |
| LOCAL       | -       | 0.25%   | -           | 0.46%   | -       | 1.14%   | -             | 1.56%   | -              | 0.43%   | -             | 0.89%   | -              | 0.25%   |
| FEDAVG      | 0.07%   | -       | 0.39%       | -       | 1.32%   | -       | 1.12%         | -       | 0.31%          | -       | 0.82%         | -       | 0.15%          | -       |
| FEDAVGFT    | 0.09%   | 0.26%   | 0.51%       | 0.59%   | 1.16%   | 1.21%   | 0.99%         | 0.89%   | 0.46%          | 0.62%   | 1.10%         | 1.26%   | 0.33%          | 0.42%   |
| KNNPER      | 0.16%   | 0.24%   | 0.36%       | 0.41%   | 0.95%   | 1.02%   | 1.41%         | 1.57%   | 0.34%          | 0.57%   | 0.91%         | 1.06%   | 0.24%          | 0.29%   |
| PARTIALFED  | -       | -       | -           | -       | -       | -       | 1.36%         | 1.39%   | 0.29%          | 0.46%   | 0.96%         | 1.97%   | 0.09%          | 0.19%   |
| APFL        | 0.19%   | 0.20%   | 0.41%       | 0.53%   | 1.41%   | 1.50%   | 1.24%         | 1.31%   | 0.36%          | 0.72%   | 0.70%         | 0.97%   | 0.42%          | 0.59%   |
| DITTO       | 0.12%   | 0.15%   | 0.49%       | 0.56%   | 1.12%   | 1.22%   | 1.35%         | 1.41%   | 0.43%          | 0.69%   | 0.84%         | 0.87%   | 0.28%          | 0.34%   |
| FEDREP      | 0.15%   | 0.29%   | 0.50%       | 0.65%   | 0.89%   | 0.94%   | 0.95%         | 1.02%   | 0.59%          | 0.79%   | 0.96%         | 1.14%   | 0.14%          | 0.10%   |
| LG FEDAVG   | 0.08%   | 0.16%   | 0.32%       | 0.56%   | 1.10%   | 1.17%   | 1.21%         | 1.24%   | 0.47%          | 0.51%   | 0.82%         | 0.96%   | 0.23%          | 0.21%   |
| HYPCLUSTER  | 0.20%   | 0.19%   | 0.56%       | 0.73%   | 0.90%   | 1.13%   | 1.43%         | 1.49%   | 0.39%          | 0.47%   | 0.98%         | 0.76%   | 0.35%          | 0.46%   |
| <i>Flow</i> | 0.23%   | 0.28%   | 0.40%       | 0.49%   | 1.16%   | 1.21%   | 1.23%         | 1.25%   | 0.32%          | 0.36%   | 0.78%         | 0.86%   | 0.21%          | 0.27%   |

607 not necessarily have to carry their personalized model states to the upcoming rounds, the personalized model  
608 recreated by *Flow* might be unable to compete against stateful approaches like PARTIALFED. Although because  
609 of the per-instance routing, *Flow* still manages to outperform PARTIALFED for the CIFAR10 (0.1/0.6) datasets,  
610 and gives comparable performance for the CIFAR100 (0.1/0.6) datasets.

## 611 C.2 Percentage of Clients Benefiting from Personalization

612 In this section we discuss the effect of personalization, by comparing each client’s performance on their individual  
613 personalized models with their performance on the global model. The evaluation, just as in section C.1, is  
614 done on the test datasets of all the clients. The goal with any personalization method is to make each client’s  
615 personalized model more beneficial (for us, in terms of accuracy) compared to the global model. Hence we  
616 want  $Acc_p > Acc_g$ , to incentivize personalization for each client. As shown in Table 6, compared to the best  
performing baseline, *Flow* improves the utility of personalization by up to 3.31% points.

Table 6: % of clients for which  $Acc_p > Acc_g$  (the higher, the better).

|                    | Stackoverflow | EMNIST        | Shakespeare   | CIFAR10 (0.1) | CIFAR100 (0.1) | CIFAR10 (0.6) | CIFAR100 (0.6) |
|--------------------|---------------|---------------|---------------|---------------|----------------|---------------|----------------|
| FEDAVGFT           | 79.26%        | 81.48%        | 79.00%        | 97.18%        | 91.74%         | 99.33%        | 88.54%         |
| KNNPER             | 82.73%        | 89.97%        | 68.87%        | 90.00%        | 94.71%         | 90.00%        | 96.37%         |
| PARTIALFED         | -             | -             | -             | 88.30%        | 90.32%         | 84.80%        | 98.64%         |
| APFL               | 69.66%        | 93.39%        | 79.22%        | 87.48%        | 86.18%         | 90.63%        | 92.03%         |
| DITTO              | 74.59%        | 79.26%        | 73.74%        | 90.52%        | 91.45%         | 89.61%        | 97.45%         |
| FEDREP             | 91.53%        | 82.20%        | 79.78%        | 92.30%        | 78.81%         | 84.64%        | 99.54%         |
| LG FEDAVG          | 83.47%        | 66.16%        | 88.43%        | 88.41%        | 86.39%         | 89.59%        | 91.73%         |
| HYPCLUSTER         | 80.46%        | 80.70%        | 74.84%        | 95.11%        | 93.70%         | 98.18%        | 99.73%         |
| <i>Flow</i> (Ours) | <b>92.74%</b> | <b>96.70%</b> | <b>89.77%</b> | <b>98.33%</b> | <b>97.29%</b>  | <b>99.62%</b> | <b>99.75%</b>  |

617

## 618 C.3 Breakdown of Correctly Classified Instances

619 Here we show a detailed view of how instances (across all the clients) get classified correctly between global  
620 and personalized models for each of the baselines. For the plots in Figures 5,  $y$ -axis represent % of instances  
621 correctly classified by (a) Both the global and the personalized models (**both-correct**), (b) Only the global  
622 model (**global-only**), and (c) Only the personalized model (**personalized-only**). This % of instances metric is

623 averaged across all clients, and is based on their test datasets. The goal here is to increase the % of instances for **both-correct** and **personalized-only**, and reduce the % of instances for **global-only**. We make the following

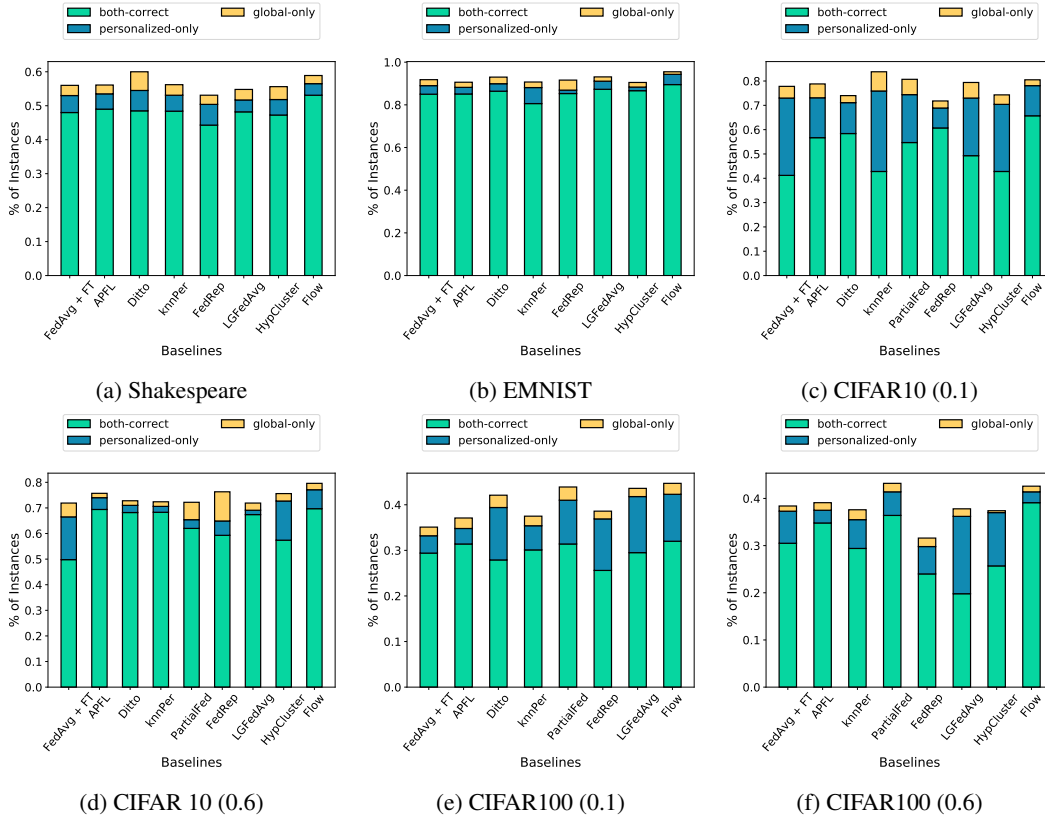

Figure 5: Different combinations of  $w_g$  and  $w_p$  accuracies.

624 observations for each of the datasets: Since *Flow* improves both the generalized and personalized accuracies, we  
 625 see higher **both-correct** for Stackoverflow (by 2.75% points), Shakespeare (by 4.34% points), EMNIST (by  
 626 3.17% points), CIFAR10 (0.1) (by 5.24% points), CIFAR10 (0.6) (by 0.03% points), CIFAR100 (0.1) (by 0.63%  
 627 points) and CIFAR100 (0.6) (by 2.78% points).  
 628

629 Due per-instance personalization, we see improvements in personalized accuracy, but those improvements  
 630 are also included in the **both-correct** bars, so solely comparing **personalized-only** bar lengths is not a right  
 631 comparison. Similarly, we see fewer instances in **global-only** bars due to the increase in instances which fall  
 632 under **both-correct**.

### 633 C.4 Analysis of Routing Decisions

634 Now we show probability value analysis of the routing policy for CIFAR10/100 datasets. Here we have fixed the  
 635 client as the client which had the highest loss difference between its global and personalized models for *Flow*.  
 636 This analysis was done during the inference stage, on the test dataset of the above-mentioned client. The box  
 637 plots show statistics on the probability of picking the global route for all the instances. Echoing the observations  
 638 made in Section 5, in Figure 6, we see a trend in increasing probability for the global parameters for the instances  
 639 which are correctly classified by only the global model. In the contrary, for the instances which can only be  
 640 classified by the personalized model, the probability for taking the global route is lower as the input passes  
 641 through more layers.

### 642 C.5 Ablation Study: Regularization

643 Figures 7 and 8 show the validation curves for generalized and personalized accuracy with and without the  
 644 regularization term used in the policy learning objective as shown in Equation 4. With regularization, we see  
 645 an improvement of 2.18% (Stackoverflow), 1.86% (Shakespeare), 3.98% (EMNIST), 2.55% (CIFAR10 0.1),  
 646 4.36% (CIFAR10 0.6), 0.91% (CIFAR100 0.1), 3.46% (CIFAR100 0.6) for the generalized accuracy. And for

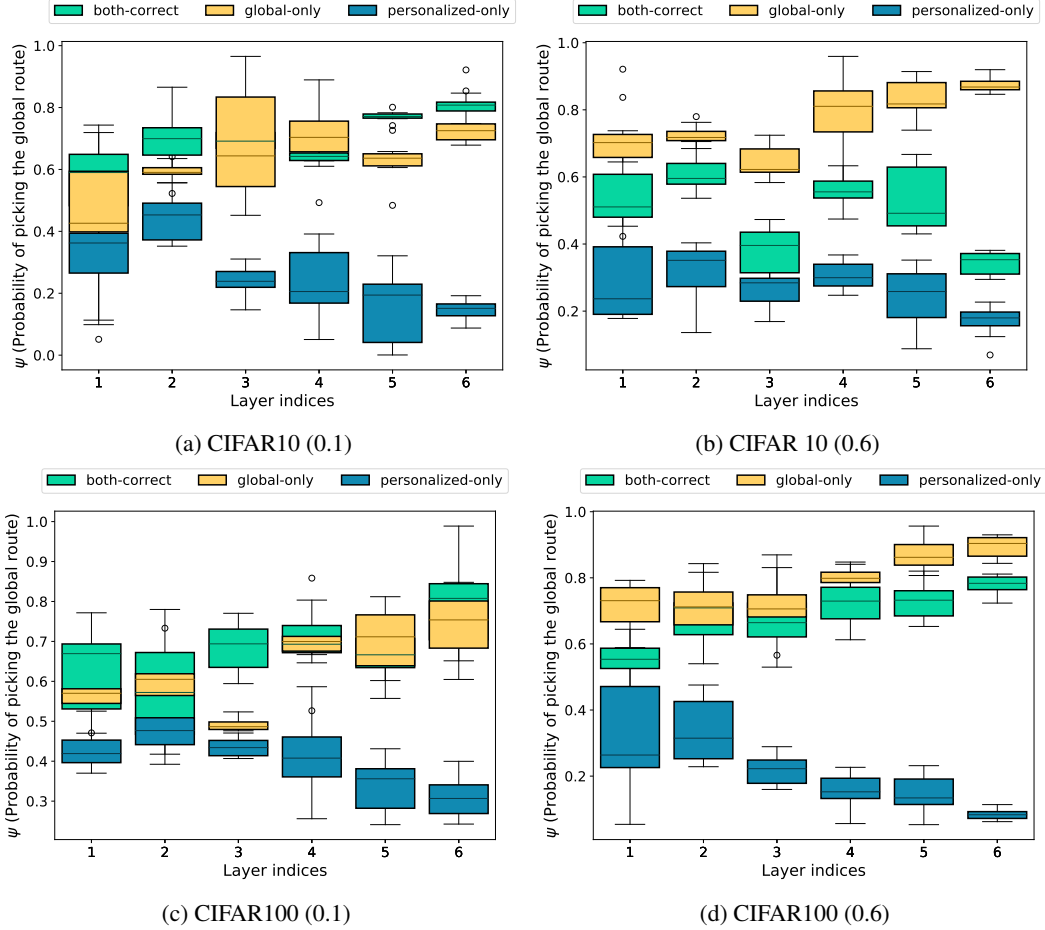

Figure 6: Behavior of  $\psi_g$  for all instances with respect to each layer of a client with highest loss difference between personalized and global models.

647 the personalized accuracy, we see an improvement of 1.92% (Stackoverflow), 2.02% (Shakespeare), 3.01%  
 648 (EMNIST), 0.65% (CIFAR10 0.1), 3.98% (CIFAR10 0.6), 2.42% (CIFAR100 0.1), 2.19% (CIFAR100 0.6).

### 649 C.6 Ablation Study: Per-instance Personalization

650 Figures 9 show the validation curves for 3 *Flow* variants: (a) Per-instance Per-client *Flow*, which is the primary  
 651 design proposed in this work, (b) Per-instance *Flow*, which makes choices between two global routes solely  
 652 based on each client’s instances, (c) Per-client *Flow*, which is simply FEDAVGFT where the personalization  
 653 only depends on a client, and not on any specific instances.

654 With all the datasets, we see a trend of Per-instance *Flow* outperforming Per-client *Flow* by 1.88% (Stack-  
 655 overflow), 0.82% (Shakespeare), 5.07% (EMNIST), 2.90% (CIFAR10 0.1), 2.41% (CIFAR10 0.6), 7.52%  
 656 (CIFAR100 0.1), 1.09% (CIFAR100 0.6). We also see the trend of Per-instance *Flow* outperforming Per-Instance  
 657 Per-Client *Flow* by 3.19% (Stackoverflow), 1.24% (Shakespeare), 0.94% (EMNIST), 0.55% (CIFAR10 0.1),  
 658 4.49% (CIFAR10 0.6), 3.88% (CIFAR100 0.1), 1.37% (CIFAR100 0.6).

### 659 C.7 Ablation Study: Soft versus Hard Policy

660 Table 7 shows the personalized accuracy of the test clients while using soft and hard policies during inference.  
 661 We see that the accuracy difference between the two designs are statistically insignificant. Hence, using a hard  
 662 policy for inference not only saves half the compute resources, but also doesn’t affect the personalized model’s  
 663 performance.

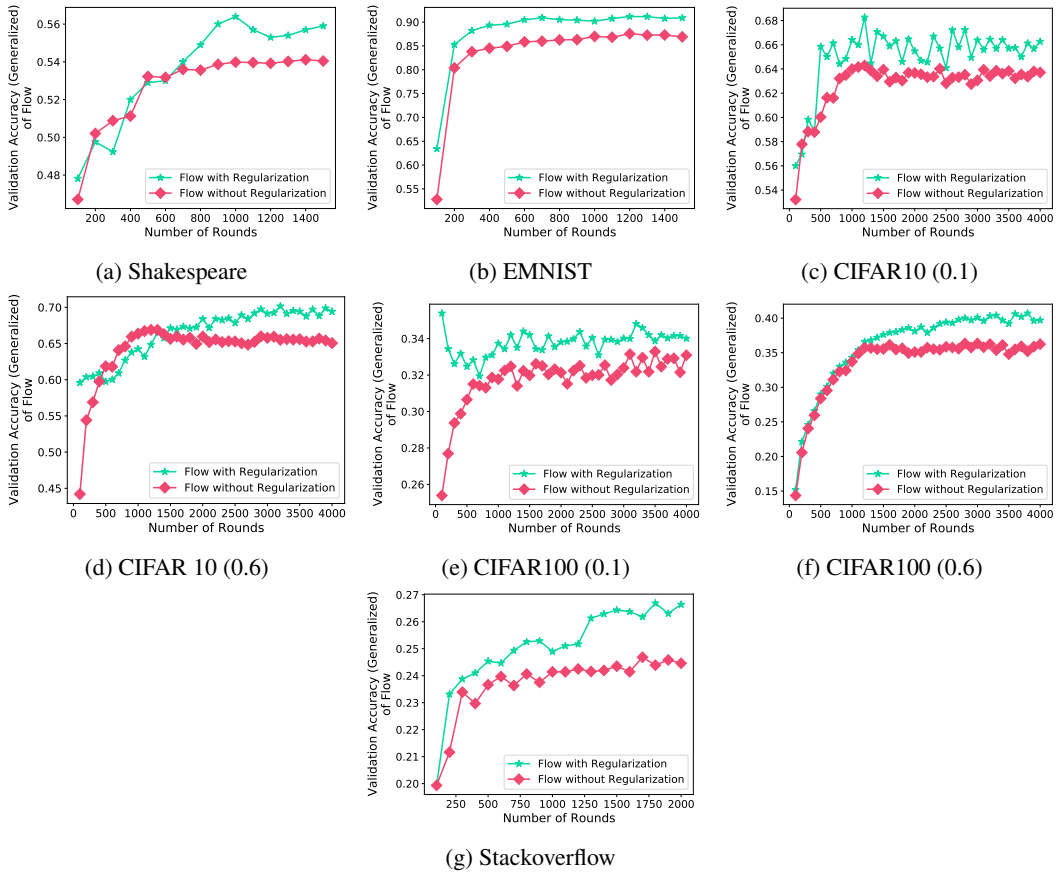

Figure 7: Generalized Accuracy of the Ablation Study on the Regularization Term used in the Policy Learning Objective.

Table 7: Test (personalized) accuracy of two of the *Flow* variants: (a) Soft Policy variant where the probability  $q$  is continuous in the range of  $[0, 1]$  during inference. (b) Hard Policy variant where the probability  $q$  is discrete over the set  $\{0,1\}$  during inference.

| Datasets    | Stackoverflow      | Shakespeare        | EMNIST             | CIFAR 10 (0.1)     | CIFAR 100 (0.1)    | CIFAR 10 (0.6)     | CIFAR 100 (0.6)    |
|-------------|--------------------|--------------------|--------------------|--------------------|--------------------|--------------------|--------------------|
| Soft Policy | 29.57% $\pm$ 0.22% | 57.01% $\pm$ 0.53% | 94.97% $\pm$ 1.06% | 77.24% $\pm$ 1.30% | 42.75% $\pm$ 0.30% | 77.02% $\pm$ 0.90% | 39.74% $\pm$ 0.13% |
| Hard Policy | 29.49% $\pm$ 0.28% | 56.20% $\pm$ 0.49% | 94.18% $\pm$ 1.21% | 76.47% $\pm$ 1.25% | 42.42% $\pm$ 0.36% | 77.11% $\pm$ 0.86% | 40.08% $\pm$ 0.27% |

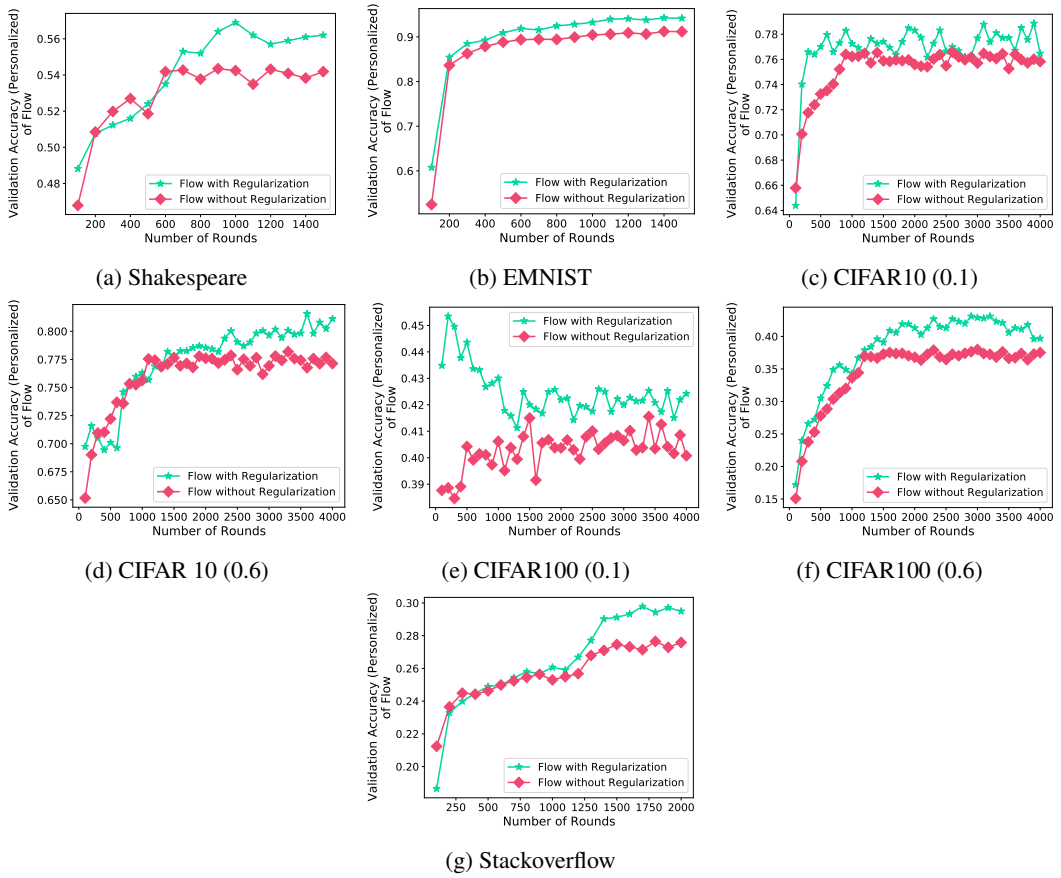

Figure 8: Personalized Accuracy of the Ablation Study on the Regularization Term used in the Policy Learning Objective.

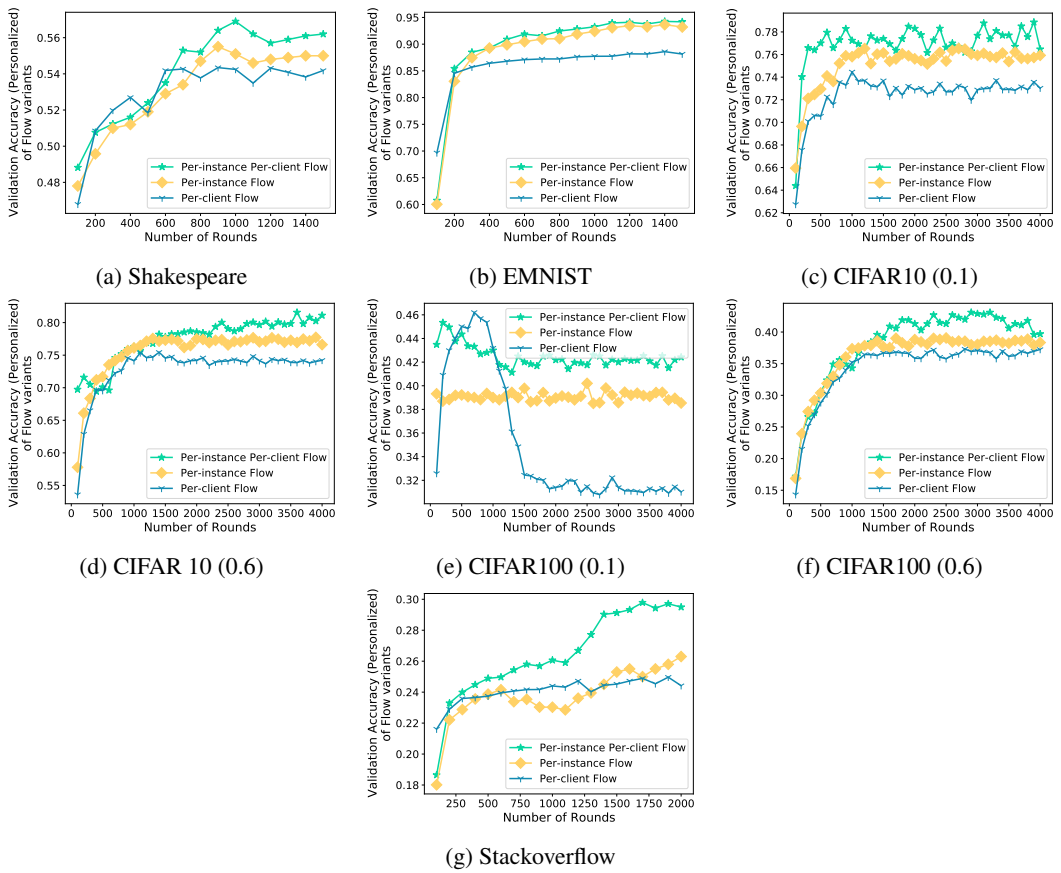

Figure 9: Ablation of the dynamic routing component (Per-client *Flow*), and the local component (Per-instance *Flow*).



## 664 D Proofs

### 665 D.1 Flow: Detailed

666 Here we give a detailed version of *Flow* (Algorithm 2) for proving its convergence properties. Here we are  
 667 assuming that the global and local model output interpolation is model-wise (after the final layer), not layer-wise.

---

#### Algorithm 2: *Flow*

---

**Input:**  $R$ : Total number of rounds,  $r \in [R]$ : Round index,  $M$ : Total number of clients,  $m \in [M]$ : Client index,  $\mathcal{M}$ : Set of available clients,  $p$ : Client sampling rate,  $K$ : Total local epoch count,  $k \in [K]$ : Epoch index,  $\eta_\ell$ : Local learning rate,  $w_g^{(r)}$ : Global model at  $r^{\text{th}}$  round,  $w_{g,m}^{(r,k)}$ :  $m^{\text{th}}$  client's local update of the global model for  $r^{\text{th}}$  round and  $k^{\text{th}}$  epoch,  $w_{\ell,m}^{(r,k)}$ :  $m^{\text{th}}$  client's local model for  $r^{\text{th}}$  round and  $k^{\text{th}}$  epoch,  $w_{p,m}^{(r,k)}$ :  $m^{\text{th}}$  client's personalized model for  $r^{\text{th}}$  round and  $k^{\text{th}}$  epoch,  $\psi_g^{(r)}$ : Global policy model at  $r^{\text{th}}$  round,  $\psi_{g,m}^{(r,k)}$ :  $m^{\text{th}}$  client's routing policy for  $r^{\text{th}}$  round and  $k^{\text{th}}$  epoch,  $\mathcal{D}_m$ : Data distribution of  $m^{\text{th}}$  client,  $\mathcal{S}_m$ : Dataset of  $m^{\text{th}}$  client,  $\zeta_{m,\ell}$ : Dataset used to train  $w_\ell$ ,  $\zeta_{m,g}$ : Dataset used to train  $w_g$  and  $\psi_g$

**Output:**  $w_g^{(R+1)}$ : Global model at the end of the training

```

1 Server randomly initializes  $w_g^{(1)}$ 
2 for  $r \in [R]$  round do
3   Sample  $M$  clients from  $\mathcal{M}$  with the rate of  $p$ 
4   Send  $w_g^{(r)}, \psi_g^{(r)}$  to all the clients
5   for  $m \in [M]$  in parallel do
6      $w_{g,m}^{(r,0)} \leftarrow w_g^{(r)}; \psi_{g,m}^{(r,0)} \leftarrow \psi_g^{(r)}; w_{\ell,m}^{(r,0)} \leftarrow w_{g,m}^{(r,0)}$ 
7      $\zeta_{m,\ell}, \zeta_{m,g} \leftarrow \mathcal{S}_m$  /* Creating two mutually exclusive datasets */
8     for  $k \in [K_1]$  epochs do
9        $w_{\ell,m}^{(r,k)} \leftarrow w_{\ell,m}^{(r,k-1)} - \eta_\ell \nabla f_m(w_{\ell,m}^{(r,k-1)}; \zeta_{m,\ell})$ 
10    end
11    for  $k \in [K_2]$  epochs do
12       $\forall (x_m, y_m) \sim \zeta_{m,g}$ , define
13         $\tilde{w}_{p,m}^{(r,k-1)}(x_m) \leftarrow \psi_{g,m}^{(r,k-1)}(x_m) \cdot w_{g,m}^{(r,k-1)}(x_m) + (1 - \psi_{g,m}^{(r,k-1)}(x_m)) \cdot w_{\ell,m}^{(r,K)}(x_m)$ 
14         $\psi_{g,m}^{(r,k)} \leftarrow \psi_{g,m}^{(r,k-1)} - \eta_\ell \nabla_{\psi_{g,m}^{(r,k-1)}} [f_m(\tilde{w}_{p,m}^{(r,k-1)}; \zeta_{m,g})]$ 
15         $\forall (x_m, y_m) \sim \zeta_{m,g}$ , define
16           $w_{p,m}^{(r,k-1)}(x_m) \leftarrow \psi_{g,m}^{(r,k)}(x_m) \cdot w_{g,m}^{(r,k-1)}(x_m) + (1 - \psi_{g,m}^{(r,k)}(x_m)) \cdot w_{\ell,m}^{(r,K)}(x_m)$ 
17           $w_{g,m}^{(r,k)} \leftarrow w_{g,m}^{(r,k-1)} - \eta_\ell \nabla_{w_{g,m}^{(r,k-1)}} f_m(w_{p,m}^{(r,k-1)}; \zeta_{m,g})$ 
18    end
19    Send back  $w_{g,m}^{(r,K)}, \psi_{g,m}^{(r,K)}, n_m := |\zeta_{m,g}|$ 
20  end
21   $w_g^{(r+1)} \leftarrow \frac{1}{nM} \sum_{m \in [M]} n_m w_{g,m}^{(r,K)}$ 
22   $\psi_g^{(r+1)} \leftarrow \frac{1}{nM} \sum_{m \in [M]} n_m \psi_{g,m}^{(r,K)}$ 
23 end

```

---

668

### 669 D.2 Basics

670 We perform theoretic analysis of *Flow* based on the following setup: There are total  $M$  clients. A client is denoted  
 671 by a unique integer  $m$  associated with it where  $m \in [M]$ . Each client  $m$  has a dataset  $\mathcal{S}_m = \{(x_m^{(i)}, y_m^{(i)}); i \in$   
 672  $[n_m]\}$  where  $(x_m^{(i)}, y_m^{(i)})$  has been sampled from  $\mathcal{D}_m$  distribution of the  $m^{\text{th}}$  client.  $n_m = |\mathcal{S}_m|$  is the total  
 673 sample count of the  $m^{\text{th}}$  client. Total sample count across all the participating client is  $n = \sum_{m \in [M]} n_m$ . The  
 674 ratio of  $m^{\text{th}}$  client's sample count to total sample count is  $\alpha = \frac{n_m}{n}$ .

675 The global distribution is defined as  $\mathcal{D} = \sum_{m \in [M]} q_m \mathcal{D}_m$  where  $q_m$  is the weight associated with  $m^{\text{th}}$  client  
 676 and  $\sum_{m \in [M]} q_m = 1$ .

Note that  $w_{p,m}$  is a combination of outputs of  $w_{g,m}$  (Global parameters) and  $w_{\ell,m}$  (Local parameters) on each layer. For tractability of analysis, we will assume that the combination is only after the last layer. Hence,

$$w_{p,m}(x_m) \leftarrow \psi_{g,m}(x_m)w_{g,m}(x_m) + (1 - \psi_{g,m}(x_m))w_{\ell,m}(x_m).$$

The local model update rule is,

$$w_{\ell,m}^{(r,k)} \leftarrow w_{\ell,m}^{(r,k-1)} - \eta_{\ell} \nabla f_m(w_{\ell,m}^{(r,k-1)})(x_m, y_m)$$

677 where  $w_{\ell,m}^{(r,0)} = w_{g,m}^{(r,0)} = w_g^{(r)}$ . Indices  $r \in [R]$  and  $k \in [K]$  are the global round and the local epoch indices.

The policy update rule is,

$$\psi_{g,m}^{(r,k)} \leftarrow \psi_{g,m}^{(r,k-1)} - \eta_{\ell} \nabla_{\psi_g} f_m(w_{p,m}^{(r,k-1)})(x_m, y_m).$$

The global model update rule is,

$$w_{g,m}^{(r,k)} \leftarrow w_{g,m}^{(r,k-1)} - \eta_{\ell} \nabla_{w_g} f_m(w_{p,m}^{(r,k-1)})(x_m, y_m).$$

678 We list out all the optimization problems relevant to *Flow*:

- **Local true risk of the personalized model**

$$F_m(w_{p,m}) := \mathbb{E}_{(x_m, y_m) \sim \mathcal{D}_m} [f_m(w_{p,m}(x_m), y_m)]$$

679 where  $f_m$  is a loss function associated with the  $m^{\text{th}}$  client.

- **Local empirical risk of the personalized model**

$$\hat{F}_m(w_{p,m}) := \frac{1}{n_m} \sum_{i \in [n_m]} f_m(w_{p,m}(x_m^{(i)}), y_m^{(i)})$$

- **Local true risk of the global model**

$$F_m(w_{g,m}) := \mathbb{E}_{(x_m, y_m) \sim \mathcal{D}_m} [f_m(w_{g,m}(x_m), y_m)]$$

- **Local empirical risk of the global model**

$$\hat{F}_m(w_{g,m}) := \frac{1}{n_m} \sum_{i \in [n_m]} f_m(w_{g,m}(x_m^{(i)}), y_m^{(i)})$$

- **Local minimizer of local empirical risk of the personalized model**

$$w_{p,m}^* \in \mathcal{H} \text{ such that } \hat{F}_m(w_{p,m}) \geq \hat{F}_m(w_{p,m}^*); \forall w_{p,m} \in \mathcal{H}, \exists \epsilon > 0, \|w_{p,m} - w_{p,m}^*\| < \epsilon$$

- **Global true risk of the global model**

$$F(w_g) = \frac{1}{nM} \sum_{m \in [M]} n_m \mathbb{E}_{(x_m, y_m) \sim \mathcal{S}_m} [f_m(w_g(x_m), y_m)] \text{ where } n = |\mathcal{S}| = \left| \bigcup_{m \in [M]} \mathcal{S}_m \right|$$

- **Global empirical risk of the global model**

$$\hat{F}(w_g) = \frac{1}{nM} \sum_{m \in [M]} n_m \hat{F}_m(w_g(x_m), y_m) = \frac{1}{nM} \sum_{m \in [M]} \sum_{i \in [n_m]} f_m(w_g(x_m^{(i)}), y_m^{(i)})$$

- **Local minimizer of global empirical risk**

$$w_g^* \in \mathcal{H} \text{ such that } \hat{F}(w_g) \geq \hat{F}(w_g^*); \forall w_g \in \mathcal{H}, \exists \epsilon > 0, \|w_g - w_g^*\| < \epsilon$$

680 We also use the following assumptions similar to [19, 12, 6]:

**Assumption D.1** (Strong Convexity).  $f_m$  is  $\mu$ -convex for  $\mu \geq 0$ . Hence,

$$\langle \nabla f_m(w), v - w \rangle \leq f_m(v) - f_m(w) - \frac{\mu}{2} \|w - v\|^2, \forall m \in [M] \text{ and } w, v \in \mathcal{H}.$$

681 We also generalize our convergence analysis for  $\mu = 0$ , general convex cases.

**Assumption D.2** (Smoothness). The gradient of  $f_m$  is  $\beta$ -Lipschitz,

$$\|\nabla f_m(w) - \nabla f_m(v)\| \leq \beta \|w - v\|, \forall m \in [M] \text{ and } w, v \in \mathcal{H}.$$

**Assumption D.3** (Bounded Local Variance).  $h_m(w) := \nabla f_m(w(x_m), y_m)$  is an unbiased stochastic gradient of  $f_m$  with variance bounded by  $\sigma_\ell^2$ .

$$\mathbb{E}_{(x_m, y_m \sim \mathcal{D}_m)} \|h_m(w) - \nabla f_m(w(x_m), y_m)\|^2 \leq \sigma_\ell^2, \quad \forall m \in [M] \text{ and } w \in \mathcal{H}.$$

**Assumption D.4** ( $(G, B)$ -Bounded Gradient Dissimilarity). There exists constants  $G \geq 0$  and  $B \geq 1$  such that

$$\frac{1}{M} \sum_{m \in [M]} \|\nabla f_m(w)\|^2 \leq G^2 + 2\beta B^2 (F(w) - F(w^*))$$

for a convex  $f_m$ . And for a non-convex  $f_m$ ,

$$\frac{1}{M} \sum_{m \in [M]} \|\nabla f_m(w)\|^2 \leq G^2 + B^2 \|\nabla F(w)\|^2.$$

682 The derivation is given in Section D.1 of Scaffold [12].

683 We also use a definition to quantify the diversity of a client's gradient with respect to the global gradient as  
684 defined in [29]:

**Definition D.5** (Gradient Diversity). The difference between gradients of the  $m^{\text{th}}$  client's true risk and the global true risk based on the global model  $w$  is,

$$\delta_m = \sup_{w \in \mathcal{H}} \|\nabla f_m(w) - \nabla F(w)\|^2$$

### 685 D.3 Convergence Proof for the Global Model: Convex (Strong and General) Cases

686 A client's local update for one local epoch on the global model, starting with  $w_{g,m}^{(r,0)} \leftarrow w_g^{(r)}$ , is

$$w_{g,m}^{(r,k+1)} = w_{g,m}^{(r,k)} - \eta_\ell h_m(w_{p,m}^{(r,k)}). \quad (8)$$

687 And a client's local update for  $K$  epochs on the global model, would be

$$w_{g,m}^{(r,K)} = w_{g,m}^{(r,0)} - \eta_\ell \sum_{k=1}^K h_m(w_{p,m}^{(r,k-1)}) \quad (9)$$

$$= w_{g,m}^{(r,0)} - \eta_\ell \sum_{k=1}^K h_m(\psi_{g,m}^{(r,k)}(x_m) w_{g,m}^{(r,k-1)}(x_m) + (1 - \psi_{g,m}^{(r,k)}(x_m)) w_{\ell,m}^{(r,K)}(x_m), y_m). \quad (10)$$

688 In both the above cases, the gradient is with respect to  $w_g$  parameters.

689 The global model update is,

$$w_g^{(r+1)} = \frac{1}{nM} \sum_{m \in [M]} n_m w_{g,m}^{(r,K)} \quad (11)$$

690 We first start with a lemma which binds the deviation between the local model  $w_{\ell,m}^{(r,K)}$  and the global model  
691 starting point  $w_g^{(r)}$  for it at round  $r$ .

**Lemma D.6** (Local model progress). *If  $m^{\text{th}}$  client's objective function  $f_m$  satisfies Assumptions D.2, D.3, and condition  $\eta_\ell \leq \frac{1}{\beta\sqrt{2K(K-1)}}$  in Algorithm 2, the following is satisfied:*

$$\mathbb{E} \|w_{\ell,m}^{(r,K)} - w_{\ell,m}^{(r,0)}\|^2 \leq 6K^2 \eta_\ell^2 \mathbb{E} \|\nabla f_m(w_g^{(r)})\|^2 + 3K \eta_\ell^2 \sigma_\ell^2$$

*Proof.*

$$\mathbb{E} \|w_{\ell,m}^{(r,K)} - w_{\ell,m}^{(r,0)}\|^2 = \mathbb{E} \|w_{\ell,m}^{(r,K-1)} - \eta_\ell \nabla f_m(w_{\ell,m}^{(r,K-1)}) - w_{\ell,m}^{(r,0)}\|^2 \quad (12)$$

$$\leq \left(1 + \frac{1}{K-1}\right) \mathbb{E} \|w_{\ell,m}^{(r,K-1)} - w_{\ell,m}^{(r,0)}\|^2 + K \eta_\ell^2 \mathbb{E} \|\nabla f_m(w_{\ell,m}^{(r,K-1)})\|^2 + \eta_\ell^2 \sigma_\ell^2 \quad (13)$$

692 Here we have used triangle inequality and variance separation.

$$\leq \left(1 + \frac{1}{K-1}\right) \mathbb{E} \|w_{\ell,m}^{(r,K-1)} - w_{\ell,m}^{(r,0)}\|^2 + K\eta_\ell^2 \mathbb{E} \|\nabla f_m(w_{\ell,m}^{(r,K-1)})\|^2 + \eta_\ell^2 \sigma_\ell^2 \quad (14)$$

$$\leq \left(1 + \frac{1}{K-1}\right) \mathbb{E} \|w_{\ell,m}^{(r,K-1)} - w_{\ell,m}^{(r,0)}\|^2 + \eta_\ell^2 \sigma_\ell^2 + K\eta_\ell^2 \mathbb{E} \|\nabla f_m(w_{\ell,m}^{(r,K-1)}) - \nabla f_m(w_{\ell,m}^{(r,0)}) + \nabla f_m(w_{\ell,m}^{(r,0)})\|^2 \quad (15)$$

$$\leq \left(1 + \frac{1}{K-1}\right) \mathbb{E} \|w_{\ell,m}^{(r,K-1)} - w_{\ell,m}^{(r,0)}\|^2 + 2K\eta_\ell^2 \mathbb{E} \|\nabla f_m(w_{\ell,m}^{(r,K-1)}) - \nabla f_m(w_{\ell,m}^{(r,0)})\|^2 + 2K\eta_\ell^2 \mathbb{E} \|\nabla f_m(w_{\ell,m}^{(r,0)})\|^2 + \eta_\ell^2 \sigma_\ell^2 \quad (16)$$

$$\leq \left(1 + \frac{1}{K-1}\right) \mathbb{E} \|w_{\ell,m}^{(r,K-1)} - w_{\ell,m}^{(r,0)}\|^2 + 2K\beta^2 \eta_\ell^2 \mathbb{E} \|w_{\ell,m}^{(r,K-1)} - w_{\ell,m}^{(r,0)}\|^2 + 2K\eta_\ell^2 \mathbb{E} \|\nabla f_m(w_{\ell,m}^{(r,0)})\|^2 + \eta_\ell^2 \sigma_\ell^2 \quad (17)$$

693 Assuming  $\eta_\ell \leq \frac{1}{\beta\sqrt{2K(K-1)}}$ , we get

$$\mathbb{E} \|w_{\ell,m}^{(r,K)} - w_{\ell,m}^{(r,0)}\|^2 \leq \left(1 + \frac{2}{K-1}\right) \mathbb{E} \|w_{\ell,m}^{(r,K-1)} - w_{\ell,m}^{(r,0)}\|^2 + 2K\eta_\ell^2 \mathbb{E} \|\nabla f_m(w_{\ell,m}^{(r,0)})\|^2 + \eta_\ell^2 \sigma_\ell^2 \quad (18)$$

694 Unrolling the above recursion,

$$\mathbb{E} \|w_{\ell,m}^{(r,K)} - w_{\ell,m}^{(r,0)}\|^2 \leq \sum_{i=1}^K \left(2K\eta_\ell^2 \mathbb{E} \|\nabla f_m(w_{\ell,m}^{(r,0)})\|^2 + \eta_\ell^2 \sigma_\ell^2\right) \left(1 + \frac{2}{K-1}\right)^i \quad (19)$$

$$\leq 3K \left(2K\eta_\ell^2 \mathbb{E} \|\nabla f_m(w_{\ell,m}^{(r,0)})\|^2 + \eta_\ell^2 \sigma_\ell^2\right) \quad (20)$$

$$= 6K^2 \eta_\ell^2 \mathbb{E} \|\nabla f_m(w_{\ell,m}^{(r,0)})\|^2 + 3K\eta_\ell^2 \sigma_\ell^2 \quad (21)$$

695  $\square$

696 Now we move forward to a lemma which binds the deviation between the local version of the global model  $w_{g,m}^{(r,k)}$  and the global model starting point  $w_g^{(r)}$  for it round  $r$ .

698 **Lemma D.7** (Local version of the global model progress). *If  $m^{\text{th}}$  client's objective function  $f_m$  satisfies*  
 699 *Assumptions D.1, D.2, D.3, and condition  $\eta_\ell \leq \frac{1}{\beta\sqrt{2k}}$  in Algorithm 2, the following is satisfied:*

$$\mathbb{E} \|w_{g,m}^{(r,k)} - w_{g,m}^{(r,0)}\|^2 \leq 8k^3 \eta_\ell^2 \mathbb{E} \|\psi_{g,m}^{(r,k)}\|^2 \mathbb{E} \|\nabla f_m(w_g^{(r)})\|^2 + 4k\eta_\ell^2 \sigma_\ell^2$$

700 *Proof.* We start by expanding  $w_{g,m}^{(r,k)}$  in terms of its previous epoch iterate.

$$\mathbb{E} \|w_{g,m}^{(r,k)} - w_{g,m}^{(r,0)}\|^2 = \mathbb{E} \|w_{g,m}^{(r,k-1)} - \eta_\ell \nabla_{w_{g,m}^{(r,k-1)}} f_m(w_{p,m}^{(r,k-1)}) - w_{g,m}^{(r,0)}\|^2 \quad (22)$$

701 Using triangle inequality and separation of variance, we get,

$$\leq \left(1 + \frac{1}{k-1}\right) \mathbb{E} \|w_{g,m}^{(r,k-1)} - w_{g,m}^{(r,0)}\|^2 + k\eta_\ell^2 \mathbb{E} \|\nabla_{w_{g,m}^{(r,k-1)}} f_m(w_{p,m}^{(r,k-1)})\|^2 + \eta_\ell^2 \sigma_\ell^2 \quad (23)$$

702 Using the convex property of  $f_m$ , we get

$$\leq \left(1 + \frac{1}{k-1}\right) \mathbb{E} \|w_{g,m}^{(r,k-1)} - w_{g,m}^{(r,0)}\|^2 + k\eta_\ell^2 \mathbb{E} \|\psi_{g,m}^{(r,k)} \nabla f_m(w_{g,m}^{(r,k-1)})\|^2 + \eta_\ell^2 \sigma_\ell^2 \quad (24)$$

$$\leq \left(1 + \frac{1}{k-1}\right) \mathbb{E} \|w_{g,m}^{(r,k-1)} - w_{g,m}^{(r,0)}\|^2 + \eta_\ell^2 \sigma_\ell^2 + k\eta_\ell^2 \mathbb{E} \|\psi_{g,m}^{(r,k)} \nabla f_m(w_{g,m}^{(r,0)})\|^2 + k\eta_\ell^2 \mathbb{E} \|\psi_{g,m}^{(r,k)}\|^2 \mathbb{E} \|\nabla f_m(w_{g,m}^{(r,0)})\|^2 \quad (25)$$

$$\leq \left(1 + \frac{1}{k-1}\right) \mathbb{E} \|w_{g,m}^{(r,k-1)} - w_{g,m}^{(r,0)}\|^2 + \eta_\ell^2 \sigma_\ell^2 + 2k\eta_\ell^2 \mathbb{E} \|\psi_{g,m}^{(r,k)}\|^2 \mathbb{E} \|\nabla f_m(w_{g,m}^{(r,0)})\|^2 + 2k\eta_\ell^2 \mathbb{E} \|\psi_{g,m}^{(r,k)}\|^2 \mathbb{E} \|\nabla f_m(w_{g,m}^{(r,k-1)}) - \nabla f_m(w_{g,m}^{(r,0)})\|^2 \quad (26)$$

$$\leq \left(1 + \frac{1}{k-1} + 2k\eta_\ell^2 \beta^2 \mathbb{E} \|\psi_{g,m}^{(r,k)}\|^2\right) \mathbb{E} \|w_{g,m}^{(r,k-1)} - w_{g,m}^{(r,0)}\|^2 + \eta_\ell^2 \sigma_\ell^2 + 2k\eta_\ell^2 \mathbb{E} \|\psi_{g,m}^{(r,k)}\|^2 \mathbb{E} \|\nabla f_m(w_{g,m}^{(r,0)})\|^2 \quad (27)$$

703 Unrolling the recursion,

$$\mathbb{E}\|w_{g,m}^{(r,k)} - w_{g,m}^{(r,0)}\|^2 \leq \sum_{i=1}^k \left( 2k\eta_\ell^2 \mathbb{E}\|\psi_{g,m}^{(r,k)}\|^2 \mathbb{E}\|\nabla f_m(w_{g,m}^{(r,0)})\|^2 + \eta_\ell^2 \sigma_\ell^2 \right) \left( 1 + \frac{1}{k-1} + 2k\eta_\ell^2 \beta^2 \mathbb{E}\|\psi_{g,m}^{(r,k)}\|^2 \right)^i \quad (28)$$

704 Assuming that  $\eta_\ell \leq \frac{1}{\beta\sqrt{2k}}$  we get  $k\eta_\ell^2 \beta^2 \leq 1$ ,

$$\mathbb{E}\|w_{g,m}^{(r,k)} - w_{g,m}^{(r,0)}\|^2 \leq \left( 2k\eta_\ell^2 \sum_{i=1}^k \mathbb{E}\|\psi_{g,m}^{(r,i)}\|^2 \mathbb{E}\|\nabla f_m(w_{g,m}^{(r,0)})\|^2 + \eta_\ell^2 \sigma_\ell^2 \right) \sum_{i=1}^k \left( 1 + \frac{1}{k-1} + 2 \right)^i \quad (29)$$

$$\leq 4k \left( 2k^2 \eta_\ell^2 \mathbb{E}\|\psi_{g,m}^{(r,k)}\|^2 \mathbb{E}\|\nabla f_m(w_g^{(r)})\|^2 + \eta_\ell^2 \sigma_\ell^2 \right) \quad (30)$$

$$\leq 8k^3 \eta_\ell^2 \mathbb{E}\|\psi_{g,m}^{(r,k)}\|^2 \mathbb{E}\|\nabla f_m(w_g^{(r)})\|^2 + 4k\eta_\ell^2 \sigma_\ell^2 \quad (31)$$

705 □

706 **Lemma D.8** (Deviation of the personalized model from the global model). *If  $m^{\text{th}}$  client's objective function*  
 707  *$f_m$  satisfies Assumptions D.1, D.2, D.3, and condition  $\eta_\ell \leq \min\left(\frac{1}{\beta\sqrt{2K(K-1)}}, \frac{1}{\beta\sqrt{2K}}\right)$  in Algorithm 2, the*  
 708 *following is satisfied:*

$$\mathbb{E}\|w_{p,m}^{(r,k)} - w_{g,m}^{(r,0)}\|^2 \leq 16k^3 \eta_\ell^2 \mathbb{E}\|1 - \psi_{g,m}^{(r,k)}\|^2 \mathbb{E}\|\nabla f_m(w_g^{(r)})\|^2 + 8k\eta_\ell^2 \sigma_\ell^2 \mathbb{E}\|\psi_{g,m}^{(r,k)}\|^2 \\ + 12K^2 \eta_\ell^2 \mathbb{E}\|1 - \psi_{g,m}^{(r,k)}\|^2 \mathbb{E}\|\nabla f_m(w_g^{(r)})\|^2 + 6K\eta_\ell^2 \sigma_\ell^2 \mathbb{E}\|\psi_{g,m}^{(r,k)}\|^2$$

*Proof.*

$$\mathbb{E}\|w_{p,m}^{(r,k)} - w_{g,m}^{(r,0)}\|^2 = \mathbb{E}\|\psi_{g,m}^{(r,k)} w_{g,m}^{(r,k)} + (1 - \psi_{g,m}^{(r,k)}) w_{\ell,m}^{(r,K)} - w_{g,m}^{(r,0)}\|^2 \quad (32)$$

$$= \mathbb{E}\|\psi_{g,m}^{(r,k)} (w_{g,m}^{(r,k)} - w_{\ell,m}^{(r,k)}) + (w_{\ell,m}^{(r,K)} - w_{g,m}^{(r,0)})\|^2 \quad (33)$$

$$= \mathbb{E}\|\psi_{g,m}^{(r,k)} (w_{g,m}^{(r,k)} - w_{g,m}^{(r,0)} + w_{g,m}^{(r,0)} - w_{\ell,m}^{(r,k)}) + (w_{\ell,m}^{(r,K)} - w_{g,m}^{(r,0)})\|^2 \quad (34)$$

$$\leq 2\mathbb{E}\|\psi_{g,m}^{(r,k)} (w_{g,m}^{(r,k)} - w_{g,m}^{(r,0)})\|^2 + 2\mathbb{E}\|(1 - \psi_{g,m}^{(r,k)}) (w_{\ell,m}^{(r,K)} - w_{g,m}^{(r,0)})\|^2 \quad (35)$$

709 Using lemmas D.6 and D.7,

$$\mathbb{E}\|w_{p,m}^{(r,k)} - w_{g,m}^{(r,0)}\|^2 \leq 2\mathbb{E}\|\psi_{g,m}^{(r,k)}\|^2 \left( 8k^3 \eta_\ell^2 \mathbb{E}\|\psi_{g,m}^{(r,k)}\|^2 \mathbb{E}\|\nabla f_m(w_g^{(r)})\|^2 + 6K^2 \eta_\ell^2 \mathbb{E}\|\nabla f_m(w_g^{(r)})\|^2 \right) \\ + 2\mathbb{E}\|1 - \psi_{g,m}^{(r,k)}\|^2 (4k\eta_\ell^2 \sigma_\ell^2 + 3K\eta_\ell^2 \sigma_\ell^2) \quad (36)$$

$$\leq 16k^3 \eta_\ell^2 \mathbb{E}\|1 - \psi_{g,m}^{(r,k)}\|^2 \mathbb{E}\|\nabla f_m(w_g^{(r)})\|^2 + 8k\eta_\ell^2 \sigma_\ell^2 \mathbb{E}\|\psi_{g,m}^{(r,k)}\|^2 \\ + 12K^2 \eta_\ell^2 \mathbb{E}\|1 - \psi_{g,m}^{(r,k)}\|^2 \mathbb{E}\|\nabla f_m(w_g^{(r)})\|^2 + 6K\eta_\ell^2 \sigma_\ell^2 \mathbb{E}\|\psi_{g,m}^{(r,k)}\|^2 \quad (37)$$

710 □

711 **Theorem D.9** (Convergence of the Global Model for Convex Cases). *If each client's objective function  $f_m$*   
 712 *satisfies Assumptions D.1, D.2, D.3, D.4 using the learning rate  $\frac{1}{\mu R} \leq \eta_\ell \leq \min\left(\frac{1}{4\sqrt{10}\beta BK^2}, \frac{1}{8B^2\beta}\right)$  in*  
 713 *Algorithm 2, then the following convergence holds:*  
 714 *(Strong Convex Case)*

$$\mathbb{E}\left[F(w_g^{(R)})\right] - F(w_g^*) \leq \frac{\mu}{\mathbf{q}_0^2 K} \mathbb{E}\|w_g^{(0)} - w_g^*\|^2 \exp\left(-\frac{\eta_\ell \mu K R}{2M}\right) + \frac{2G^2}{\mathbf{q}_0^2 \mu R} \\ + \frac{40K^2 \beta}{\mu^2 R^2} \left(\frac{\beta^2}{\mu R} + 1\right) \frac{\mathbf{q}_1^2}{\mathbf{q}_0^2} G^2 + \frac{28K\beta}{\mu^2 R^2} \left(\frac{2\beta^2 K}{\mu^2 R^2} + 1\right) \sigma_\ell^2$$

715 *(General Convex Case)*

$$\mathbb{E}\left[F(w_g^{(R)})\right] - F(w_g^*) \leq \frac{1}{\eta_\ell K \mathbf{q}_0^2 (R+1)} \mathbb{E}\|w_g^{(0)} - w_g^*\|^2 + \eta_\ell \left(\frac{2G^2}{\mathbf{q}_0^2}\right)^{1/2} + \\ + \eta_\ell^2 \left(40K^2 \beta \frac{\mathbf{q}_1^2}{\mathbf{q}_0^2} G^2\right)^{1/3} + \eta_\ell^3 \left(40K^2 \beta^3 \frac{\mathbf{q}_1^2}{\mathbf{q}_0^2} G^2\right)^{1/4} + \eta_\ell^2 (28K\beta\sigma_\ell^2)^{1/3} + \eta_\ell^4 (56K\beta^3\sigma_\ell^2)^{1/5}$$

716 where  $\mathbf{q}_{0/1}^2$  are the probabilities of picking global/local routes averaged over all the instances sampled from the  
 717 global distribution.

718 *Proof.* From the update rules stated in Equations 10 and 11:

$$w_g^{(r+1)} - w_g^* = \frac{1}{nM} \sum_{m \in [M]} n_m \left[ w_{g,m}^{(r)} - \eta_\ell \sum_{k=1}^K h_m(w_{p,m}^{(r,k-1)}) \right] - w_g^* \quad (38)$$

$$= \frac{1}{nM} \sum_{m \in [M]} n_m w_{g,m}^{(r)} - \frac{\eta_\ell}{nM} \sum_{m \in [M]} n_m \sum_{k=1}^K h_m(w_{p,m}^{(r,k-1)}) - w_g^* \quad (39)$$

$$= w_g^{(r)} - w_g^* - \frac{\eta_\ell}{nM} \sum_{m \in [M]} n_m \sum_{k=1}^K h_m(w_{p,m}^{(r,k-1)}) \quad (40)$$

719 Taking squared norm and expectation on both sides with respect to the choice of  $h_m$ ,

$$\begin{aligned} \mathbb{E} \left[ \|w_g^{(r+1)} - w_g^*\|^2 \right] &\leq \mathbb{E} \left[ \|w_g^{(r)} - w_g^*\|^2 \right] - 2\eta_\ell \left\langle \frac{1}{nM} \sum_{m \in [M]} n_m \sum_{k=1}^K \mathbb{E}[h_m(w_{p,m}^{(r,k-1)})], w_g^{(r)} - w_g^* \right\rangle \\ &\quad + \eta_\ell^2 \mathbb{E} \left[ \left\| \frac{1}{nM} \sum_{m \in [M]} n_m \sum_{k=1}^K h_m(w_{p,m}^{(r,k-1)}) \right\|^2 \right] \end{aligned} \quad (41)$$

720 Separating mean and variance according to Lemma 4 of Scaffold [12],

$$\begin{aligned} &\leq \mathbb{E} \left[ \|w_g^{(r)} - w_g^*\|^2 \right] - 2\eta_\ell \underbrace{\left\langle \frac{1}{nM} \sum_{m \in [M]} n_m \sum_{k=1}^K \mathbb{E}[\nabla_{w_{g,m}^{(r,k-1)}} f_m(w_{p,m}^{(r,k-1)})], w_g^{(r)} - w_g^* \right\rangle}_{T_1} \\ &\quad + \eta_\ell^2 \underbrace{\mathbb{E} \left[ \left\| \frac{1}{nM} \sum_{m \in [M]} n_m \sum_{k=1}^K \nabla_{w_{g,m}^{(r,k-1)}} f_m(w_{p,m}^{(r,k-1)}) \right\|^2 \right]}_{T_2} + \frac{\eta_\ell^2 \sigma_\ell^2 K}{M} \end{aligned} \quad (42)$$

**Bounding  $T_1$**

$$T_1 = -2\eta_\ell \left\langle \frac{1}{nM} \sum_{m \in [M]} n_m \sum_{k=1}^K \mathbb{E}[\nabla_{w_{g,m}^{(r,k-1)}} f_m(w_{p,m}^{(r,k-1)})], w_g^{(r)} - w_g^* \right\rangle \quad (43)$$

$$= 2\eta_\ell \left\langle \frac{1}{nM} \sum_{m \in [M]} n_m \sum_{k=1}^K \mathbb{E}[\nabla_{w_{g,m}^{(r,k-1)}} f_m(w_{p,m}^{(r,k-1)})], w_g^* - w_g^{(r)} \right\rangle \quad (44)$$

721 Using perturbed strong convexity lemma (Lemma 5) from [12], we get,

$$T_1 \leq \frac{2\eta_\ell}{nM} \sum_{m \in [M]} n_m \sum_{k=1}^K \left( \mathbb{E}[\nabla f_m(w_g^*)] - \nabla f_m(w_g^{(r)}) - \frac{\mu}{4} \mathbb{E}[\|w_g^{(r)} - w_g^*\|^2] + \beta \underbrace{\mathbb{E}[\|w_{p,m}^{(r,k-1)} - w_g^{(r)}\|^2]}_{\text{Lemma D.8}} \right) \quad (45)$$

$$\begin{aligned} &\leq -2\eta_\ell K \left( \mathbb{E}[F(w_g^{(r)})] - F(w_g^*) \right) - \frac{\eta_\ell \mu K}{2M} \mathbb{E}[\|w_g^{(r)} - w_g^*\|^2] \\ &\quad + \frac{2\eta_\ell \beta}{nM} \sum_{m \in [M]} n_m \sum_{k=1}^K \left( 16k^3 \eta_\ell^2 \mathbb{E}[\|1 - \psi_{g,m}^{(r,k)}\|^2] \mathbb{E}[\|\nabla f_m(w_g^{(r)})\|^2] + 8k\eta_\ell^2 \sigma_\ell^2 \mathbb{E}[\|\psi_{g,m}^{(r,k)}\|^2] \right. \\ &\quad \left. + 12K^2 \eta_\ell^2 \mathbb{E}[\|1 - \psi_{g,m}^{(r,k)}\|^2] \mathbb{E}[\|\nabla f_m(w_g^{(r)})\|^2] + 6K\eta_\ell^2 \sigma_\ell^2 \mathbb{E}[\|\psi_{g,m}^{(r,k)}\|^2] \right) \end{aligned} \quad (46)$$

$$\begin{aligned} &\leq -2\eta_\ell K \left( \mathbb{E}[F(w_g^{(r)})] - F(w_g^*) \right) - \frac{\eta_\ell \mu K}{2M} \mathbb{E}[\|w_g^{(r)} - w_g^*\|^2] \\ &\quad + \frac{2\eta_\ell \beta}{nM} \sum_{m \in [M]} n_m \left( 16K^4 \eta_\ell^2 \mathbb{E}[\|\nabla f_m(w_g^{(r)})\|^2] \mathbb{E}[\|1 - \psi_{g,m}^{(r,K)}\|^2] + 8K^2 \eta_\ell^2 \sigma_\ell^2 \mathbb{E}[\|\psi_{g,m}^{(r,K)}\|^2] \right. \\ &\quad \left. + 12K^3 \eta_\ell^2 \mathbb{E}[\|\nabla f_m(w_g^{(r)})\|^2] \mathbb{E}[\|1 - \psi_{g,m}^{(r,K)}\|^2] + 6K^2 \eta_\ell^2 \sigma_\ell^2 \mathbb{E}[\|\psi_{g,m}^{(r,K)}\|^2] \right), \end{aligned} \quad (47)$$

722 Next, using Assumption D.4,

$$\begin{aligned}
T_1 &\leq -2\eta_\ell K \left( \mathbb{E}[F(w_g^{(r)})] - F(w_g^*) \right) - \frac{\eta_\ell \mu K}{2M} \mathbb{E} \|w_g^{(r)} - w_g^*\|^2 \\
&\quad + 32\eta_\ell^3 K^4 \beta \mathbb{E} \|1 - \psi_g^{(r)}\|^2 \left( G^2 + 2\beta B^2 \left( \mathbb{E} \left[ F(w_g^{(r)}) \right] - F(w_g^*) \right) \right) + 16\eta_\ell^3 K^2 \beta \sigma_\ell^2 \mathbb{E} \|\psi_g^{(r)}\|^2 \\
&\quad + 24\eta_\ell^3 K^3 \beta \mathbb{E} \|1 - \psi_g^{(r)}\|^2 \left( G^2 + 2\beta B^2 \left( \mathbb{E} \left[ F(w_g^{(r)}) \right] - F(w_g^*) \right) \right) + 12\eta_\ell^3 K^2 \beta \sigma_\ell^2 \mathbb{E} \|\psi_g^{(r)}\|^2
\end{aligned} \tag{48}$$

$$\begin{aligned}
&\leq -2\eta_\ell K \left( \mathbb{E}[F(w_g^{(r)})] - F(w_g^*) \right) - \frac{\eta_\ell \mu K}{2M} \mathbb{E} \|w_g^{(r)} - w_g^*\|^2 \\
&\quad + 16\eta_\ell^3 K^3 \beta^2 B^2 (4K + 3) \mathbb{E} \|1 - \psi_g^{(r)}\|^2 \left( \mathbb{E}[F(w_g^{(r)})] - F(w_g^*) \right) \\
&\quad + 8\eta_\ell^3 K^3 \beta (4K + 3) \mathbb{E} \|1 - \psi_g^{(r)}\|^2 G^2 + 28\eta_\ell^3 K^2 \beta \sigma_\ell^2 \mathbb{E} \|\psi_g^{(r)}\|^2
\end{aligned} \tag{49}$$

**Bounding  $T_2$**

$$T_2 = \eta_\ell^2 \mathbb{E} \left[ \left\| \frac{1}{nM} \sum_{m \in [M]} n_m \sum_{k=1}^K \nabla_{w_{g,m}^{(r,k-1)}} f_m(w_{p,m}^{(r,k-1)}) \right\|^2 \right] \tag{50}$$

$$= \eta_\ell^2 \mathbb{E} \left[ \left\| \frac{1}{nM} \sum_{m \in [M]} n_m \sum_{k=1}^K (\nabla_{w_{g,m}^{(r,k-1)}} f_m(w_{p,m}^{(r,k-1)}) - \nabla f_m(w_g^{(r)}) + \nabla f_m(w_g^{(r)})) \right\|^2 \right] \tag{51}$$

$$\begin{aligned}
&\leq 2\eta_\ell^2 \mathbb{E} \left[ \left\| \frac{1}{nM} \sum_{m \in [M]} n_m \sum_{k=1}^K (\nabla_{w_{g,m}^{(r,k-1)}} f_m(w_{p,m}^{(r,k-1)}) - \nabla f_m(w_g^{(r)})) \right\|^2 \right] \\
&\quad + 2\eta_\ell^2 \mathbb{E} \left[ \left\| \frac{1}{nM} \sum_{m \in [M]} n_m \sum_{k=1}^K \nabla f_m(w_g^{(r)}) \right\|^2 \right]
\end{aligned} \tag{52}$$

$$\leq 2\eta_\ell^2 \beta^2 K \cdot \frac{1}{nM} \sum_{m \in [M]} n_m \underbrace{\sum_{k=1}^K \mathbb{E} \left[ \left\| w_{p,m}^{(r,k-1)} - w_g^{(r)} \right\|^2 \right]}_{\text{Lemma D.8}} + 2\eta_\ell^2 K \cdot \frac{1}{nM} \sum_{m \in [M]} n_m \sum_{k=1}^K \mathbb{E} \left[ \left\| \nabla f_m(w_g^{(r)}) \right\|^2 \right] \tag{53}$$

$$\begin{aligned}
&\leq 16\eta_\ell^4 K^4 \beta^3 B^2 (4K + 3) \mathbb{E} \|1 - \psi_g^{(r)}\|^2 \left( \mathbb{E}[F(w_g^{(r)})] - F(w_g^*) \right) + 8\eta_\ell^4 K^4 \beta^3 (4K + 3) \mathbb{E} \|1 - \psi_g^{(r)}\|^2 G^2 \\
&\quad + 56\eta_\ell^5 K^3 \beta^3 \sigma_\ell^2 \mathbb{E} \|\psi_g^{(r)}\|^2 + 2\eta_\ell^2 K \left( G^2 + 2\beta B^2 \mathbb{E}[F(w_g^{(r)})] - F(w_g^*) \right)
\end{aligned} \tag{54}$$

723 Plugging in  $T_1$  and  $T_2$  bounds,

$$\begin{aligned}
\mathbb{E} \left[ \|w_g^{(r+1)} - w_g^*\|^2 \right] &\leq \mathbb{E} \left[ \|w_g^{(r)} - w_g^*\|^2 \right] - 2\eta_\ell K \left( \mathbb{E}[F(w_g^{(r)})] - F(w_g^*) \right) - \frac{\eta_\ell \mu K}{2M} \mathbb{E} \|w_g^{(r)} - w_g^*\|^2 \\
&\quad + 16\eta_\ell^3 K^3 \beta^2 B^2 (4K + 3) (\eta_\ell \beta + 1) \mathbb{E} \|1 - \psi_g^{(r)}\|^2 \left( \mathbb{E}[F(w_g^{(r)})] - F(w_g^*) \right) \\
&\quad + 8\eta_\ell^3 K^3 \beta (4K + 3) (\eta_\ell \beta^2 + 1) \mathbb{E} \|1 - \psi_g^{(r)}\|^2 G^2 + 28\eta_\ell^3 K^2 \beta \sigma_\ell^2 \mathbb{E} \|\psi_g^{(r)}\|^2 \\
&\quad + 56\eta_\ell^5 K^3 \beta^3 \sigma_\ell^2 \mathbb{E} \|\psi_g^{(r)}\|^2 + 2\eta_\ell^2 K \left( G^2 + 2\beta B^2 \mathbb{E}[F(w_g^{(r)})] - F(w_g^*) \right)
\end{aligned} \tag{55}$$

724 Rearranging the terms, and replacing  $\mathbb{E} \|\psi_g^{(r)}\|^2$  and  $\mathbb{E} \|1 - \psi_g^{(r)}\|^2$  with  $\mathbf{q}_0^2$  (probability of picking global route averaged over the instances sampled from the global distribution) and  $\mathbf{q}_1^2$  respectively,

$$\begin{aligned}
\mathbb{E} \left[ \|w_g^{(r+1)} - w_g^*\|^2 \right] &\leq \left( 1 - \frac{\eta_\ell \mu K}{2M} \right) \mathbb{E} \left[ \|w_g^{(r)} - w_g^*\|^2 \right] \\
&\quad - (2\eta_\ell K - 80\eta_\ell^3 K^4 \beta^2 B^2 (\eta_\ell \beta + 1) \mathbf{q}_1^2 - 4\eta_\ell^2 K \beta B^2) \left( \mathbb{E} \left[ F(w_g^{(r)}) \right] - F(w_g^*) \right) \\
&\quad + 40\eta_\ell^3 K^3 \beta (\eta_\ell \beta^2 + 1) \mathbf{q}_1^2 G^2 + 2\eta_\ell^2 K G^2 + 28\eta_\ell^3 K^2 \beta (2\eta_\ell^2 \beta^2 K + 1) \mathbf{q}_0^2 \sigma_\ell^2
\end{aligned} \tag{56}$$

726 Assuming  $\frac{\eta_\ell K}{2} \geq 80\eta_\ell^3 K^4 \beta^2 B^2 (\eta_\ell \beta + 1) \implies \eta_\ell \leq \frac{1}{4\sqrt{10}\beta B K^2}$  and  $\frac{\eta_\ell K}{2} \geq 4\eta_\ell^2 K \beta B^2 \implies \eta_\ell \leq \frac{1}{8B^2 \beta}$ ,  
727 we get

$$\begin{aligned} \mathbb{E} \left[ \|w_g^{(r+1)} - w_g^*\|^2 \right] &\leq \left( 1 - \frac{\eta_\ell \mu K}{2M} \right) \mathbb{E} \left[ \|w_g^{(r)} - w_g^*\|^2 \right] - \eta_\ell K (1 - \mathbf{q}_1)^2 \left( \mathbb{E} \left[ F(w_g^{(r)}) \right] - F(w_g^*) \right) \\ &\quad + 40\eta_\ell^3 K^3 \beta (\eta_\ell \beta^2 + 1) \mathbf{q}_1^2 G^2 + 2\eta_\ell^2 K G^2 + 28\eta_\ell^3 K^2 \beta (2\eta_\ell^2 \beta^2 K + 1) \mathbf{q}_0^2 \sigma_\ell^2 \end{aligned} \quad (57)$$

728 Moving  $\mathbb{E} \left[ F(w_g^{(r)}) \right] - F(w_g^*)$  to the left-hand side, and rest of the terms on right-hand side,

$$\begin{aligned} \eta_\ell K \mathbf{q}_0^2 \left( \mathbb{E} \left[ F(w_g^{(r)}) \right] - F(w_g^*) \right) &\leq \left( 1 - \frac{\eta_\ell \mu K}{2M} \right) \mathbb{E} \left[ \|w_g^{(r)} - w_g^*\|^2 \right] - \mathbb{E} \left[ \|w_g^{(r+1)} - w_g^*\|^2 \right] \\ &\quad + 40\eta_\ell^3 K^3 \beta (\eta_\ell \beta^2 + 1) \mathbf{q}_1^2 G^2 + 2\eta_\ell^2 K G^2 + 28\eta_\ell^3 K^2 \beta (2\eta_\ell^2 \beta^2 K + 1) \mathbf{q}_0^2 \sigma_\ell^2 \end{aligned} \quad (58)$$

$$\begin{aligned} \therefore \mathbb{E} \left[ F(w_g^{(r)}) \right] - F(w_g^*) &\leq \frac{1}{\eta_\ell K \mathbf{q}_0^2} \left( 1 - \frac{\eta_\ell \mu K}{2M} \right) \mathbb{E} \left[ \|w_g^{(r)} - w_g^*\|^2 \right] - \frac{1}{\eta_\ell K \mathbf{q}_0^2} \mathbb{E} \left[ \|w_g^{(r+1)} - w_g^*\|^2 \right] \\ &\quad + 40\eta_\ell^2 K^2 \beta (\eta_\ell \beta^2 + 1) \frac{\mathbf{q}_1^2}{\mathbf{q}_0^2} G^2 + \frac{2\eta_\ell G^2}{\mathbf{q}_0^2} + 28\eta_\ell^2 K \beta (2\eta_\ell^2 \beta^2 K + 1) \sigma_\ell^2 \end{aligned} \quad (59)$$

729 Unrolling the recursion over  $R$  rounds and then using the linear convergence lemma (Lemma 1) for strong  
730 convex case from Scaffold [12],

$$\begin{aligned} \mathbb{E} \left[ F(w_g^{(R)}) \right] - F(w_g^*) &\leq \frac{\mu}{\mathbf{q}_0^2 K} \mathbb{E} \|w_g^{(0)} - w_g^*\|^2 \exp \left( -\frac{\eta_\ell \mu K R}{2M} \right) + \frac{2G^2}{\mathbf{q}_0^2 \mu R} \\ &\quad + \frac{40K^2 \beta}{\mu^2 R^2} \left( \frac{\beta^2}{\mu R} + 1 \right) \frac{\mathbf{q}_1^2}{\mathbf{q}_0^2} G^2 + \frac{28K \beta}{\mu^2 R^2} \left( \frac{2\beta^2 K}{\mu^2 R^2} + 1 \right) \sigma_\ell^2 \end{aligned} \quad (60)$$

731 Unrolling the recursion over  $R$  rounds and then using the sublinear convergence lemma (Lemma 2) for general  
732 convex case from Scaffold [12],

$$\begin{aligned} \mathbb{E} \left[ F(w_g^{(R)}) \right] - F(w_g^*) &\leq \frac{1}{\eta_\ell K \mathbf{q}_0^2 (R+1)} \mathbb{E} \|w_g^{(0)} - w_g^*\|^2 + \eta_\ell \left( \frac{2G^2}{\mathbf{q}_0^2} \right)^{1/2} + \\ &\quad + \eta_\ell^2 \left( 40K^2 \beta \frac{\mathbf{q}_1^2}{\mathbf{q}_0^2} G^2 \right)^{1/2} + \eta_\ell^3 \left( 40K^2 \beta^3 \frac{\mathbf{q}_1^2}{\mathbf{q}_0^2} G^2 \right)^{1/3} + \eta_\ell^2 (28K \beta \sigma_\ell^2)^{1/3} + \eta_\ell^4 (56K \beta^3 \sigma_\ell^2)^{1/5} \end{aligned} \quad (61)$$

733 □

#### 734 **D.4 Convergence Proof for the Global Model: Non-convex Case**

735 We start with a non-convex version of Lemmas D.7 and D.8,

736 **Lemma D.10** (Local version of the global model progress). *If  $m^{\text{th}}$  client's objective function  $f_m$  satisfies*  
737 *Assumptions D.2, D.3, in Algorithm 2, the following is satisfied:*

$$\mathbb{E} \|w_{g,m}^{(r,k)} - w_{g,m}^{(r,0)}\|^2 \leq 4k^2 \eta_\ell^2 \mathbb{E} \|\nabla f_m(w_g^{(r)})\|^2 + 2k\eta_\ell^2 \sigma_\ell^2 + 4k^2 \eta_\ell^2 \beta^2 \sum_{i=1}^k \mathbb{E} \|w_{p,m}^{(r,i-1)} - w_g^{(r)}\|^2$$

738 *Proof.* We start by expanding  $w_{g,m}^{(r,k)}$  in terms of its previous epoch iterate.

$$\mathbb{E} \|w_{g,m}^{(r,k)} - w_{g,m}^{(r,0)}\|^2 = \mathbb{E} \|w_{g,m}^{(r,k-1)} - \eta_\ell \nabla_{w_{g,m}^{(r,k-1)}} f_m(w_{p,m}^{(r,k-1)}) - w_{g,m}^{(r,0)}\|^2 \quad (62)$$

739 Using triangle inequality and separation of variance, we get,

$$\leq \left( 1 + \frac{1}{k-1} \right) \mathbb{E} \|w_{g,m}^{(r,k-1)} - w_{g,m}^{(r,0)}\|^2 + k\eta_\ell^2 \mathbb{E} \|\nabla_{w_{g,m}^{(r,k-1)}} f_m(w_{p,m}^{(r,k-1)})\|^2 + \eta_\ell^2 \sigma_\ell^2 \quad (63)$$

$$\begin{aligned} &\leq \left( 1 + \frac{1}{k-1} \right) \mathbb{E} \|w_{g,m}^{(r,k-1)} - w_{g,m}^{(r,0)}\|^2 + \eta_\ell^2 \sigma_\ell^2 \\ &\quad + k\eta_\ell^2 \mathbb{E} \|\nabla f_m(w_{p,m}^{(r,k-1)}) - \nabla f_m(w_{g,m}^{(r,0)}) + \nabla f_m(w_{g,m}^{(r,0)})\|^2 \end{aligned} \quad (64)$$

$$(65)$$



740

$$\begin{aligned} &\leq \left(1 + \frac{1}{k-1}\right) \mathbb{E} \|w_{g,m}^{(r,k-1)} - w_{g,m}^{(r,0)}\|^2 + \eta_\ell^2 \sigma_\ell^2 + 2k\eta_\ell^2 \mathbb{E} \|\nabla f_m(w_g^{(r)})\|^2 \\ &\quad + 2k\eta_\ell^2 \mathbb{E} \|\nabla f_m(w_{p,m}^{(r,k-1)}) - \nabla f_m(w_g^{(r)})\|^2 \end{aligned} \quad (66)$$

$$\begin{aligned} &\leq \left(1 + \frac{1}{k-1}\right) \mathbb{E} \|w_{g,m}^{(r,k-1)} - w_{g,m}^{(r,0)}\|^2 + \eta_\ell^2 \sigma_\ell^2 + 2k\eta_\ell^2 \mathbb{E} \|\nabla f_m(w_g^{(r)})\|^2 \\ &\quad + 2k\eta_\ell^2 \beta^2 \mathbb{E} \|w_{p,m}^{(r,k-1)} - w_g^{(r)}\|^2 \end{aligned} \quad (67)$$

(68)

741 Unrolling the recursion,

$$\begin{aligned} \mathbb{E} \|w_{g,m}^{(r,k)} - w_{g,m}^{(r,0)}\|^2 &\leq \sum_{i=1}^k \left(2k\eta_\ell^2 \mathbb{E} \|\nabla f_m(w_g^{(r)})\|^2 + \eta_\ell^2 \sigma_\ell^2 + 2k\eta_\ell^2 \beta^2 \mathbb{E} \|w_{p,m}^{(r,i-1)} - w_g^{(r)}\|^2\right) \\ &\quad \cdot \left(1 + \frac{1}{k-1}\right)^i \end{aligned} \quad (69)$$

742

$$\mathbb{E} \|w_{g,m}^{(r,k)} - w_{g,m}^{(r,0)}\|^2 \leq 2k \left(2k\eta_\ell^2 \mathbb{E} \|\nabla f_m(w_g^{(r)})\|^2 + \eta_\ell^2 \sigma_\ell^2 + 2k\eta_\ell^2 \beta^2 \sum_{i=1}^k \mathbb{E} \|w_{p,m}^{(r,i-1)} - w_g^{(r)}\|^2\right) \quad (70)$$

$$= 4k^2 \eta_\ell^2 \mathbb{E} \|\nabla f_m(w_g^{(r)})\|^2 + 2k\eta_\ell^2 \sigma_\ell^2 + 4k^2 \eta_\ell^2 \beta^2 \sum_{i=1}^k \mathbb{E} \|w_{p,m}^{(r,i-1)} - w_g^{(r)}\|^2 \quad (71)$$

743

□

744 **Lemma D.11** (Deviation of the personalized model from the global model). *If  $m^{\text{th}}$  client's objective function*  
 745  *$f_m$  satisfies Assumptions D.2, D.3, and condition  $\eta_\ell \leq \frac{1}{2\sqrt{2}\beta K}$  in Algorithm 2, the following is satisfied:*

$$\mathbb{E} \|w_{p,m}^{(r,k)} - w_{g,m}^{(r,0)}\|^2 \leq 20K^3 \eta_\ell^2 \mathbb{E} \|1 - \psi_{g,m}^{(r,k)}\|^2 \mathbb{E} \|\nabla f_m(w_g^{(r)})\|^2 + 10K^2 \eta_\ell^2 \sigma_\ell^2 \mathbb{E} \|\psi_{g,m}^{(r,k)}\|^2.$$

*Proof.*

$$\mathbb{E} \|w_{p,m}^{(r,k)} - w_{g,m}^{(r,0)}\|^2 = \mathbb{E} \|\psi_{g,m}^{(r,k)} w_{g,m}^{(r,k)} + (1 - \psi_{g,m}^{(r,k)}) w_{\ell,m}^{(r,K)} - w_{g,m}^{(r,0)}\|^2 \quad (72)$$

$$= \mathbb{E} \|\psi_{g,m}^{(r,k)} (w_{g,m}^{(r,k)} - w_{\ell,m}^{(r,k)}) + (w_{\ell,m}^{(r,K)} - w_{g,m}^{(r,0)})\|^2 \quad (73)$$

$$= \mathbb{E} \|\psi_{g,m}^{(r,k)} (w_{g,m}^{(r,k)} - w_{g,m}^{(r,0)} + w_{g,m}^{(r,0)} - w_{\ell,m}^{(r,k)}) + (w_{\ell,m}^{(r,K)} - w_{g,m}^{(r,0)})\|^2 \quad (74)$$

$$\leq 2\mathbb{E} \|\psi_{g,m}^{(r,k)} (w_{g,m}^{(r,k)} - w_{g,m}^{(r,0)})\|^2 + 2\mathbb{E} \|(1 - \psi_{g,m}^{(r,k)}) (w_{\ell,m}^{(r,K)} - w_{\ell,m}^{(r,0)})\|^2 \quad (75)$$

746 Using lemmas D.6 and D.10,

$$\begin{aligned} \mathbb{E} \|w_{p,m}^{(r,k)} - w_{g,m}^{(r,0)}\|^2 &\leq 2\mathbb{E} \|1 - \psi_{g,m}^{(r,k+1)}\|^2 \left(4K^2 \eta_\ell^2 \mathbb{E} \|\nabla f_m(w_g^{(r)})\|^2 + 6K^2 \eta_\ell^2 \mathbb{E} \|\nabla f_m(w_g^{(r)})\|^2\right) \\ &\quad + 2\mathbb{E} \|\psi_{g,m}^{(r,k+1)}\|^2 \left(2K\eta_\ell^2 \sigma_\ell^2 + 3K\eta_\ell^2 \sigma_\ell^2 + 4K^2 \eta_\ell^2 \beta^2 \sum_{i=1}^k \mathbb{E} \|w_{p,m}^{(r,i-1)} - w_g^{(r)}\|^2\right) \end{aligned} \quad (76)$$

747 Assuming  $8K^2 \eta_\ell^2 \beta^2 \leq 1 \implies \eta \leq \frac{1}{2\sqrt{2}\beta K}$  and unrolling the recursion over  $w_{p,m}^{(r,i-1)} - w_g^{(r)}$ ,

$$\leq \sum_{i=1}^k \left(20K^2 \eta_\ell^2 \mathbb{E} \|1 - \psi_{g,m}^{(r,k)}\|^2 \mathbb{E} \|\nabla f_m(w_g^{(r)})\|^2 + 10K\eta_\ell^2 \sigma_\ell^2 \mathbb{E} \|\psi_{g,m}^{(r,k)}\|^2\right) \quad (77)$$

$$\leq 20K^3 \eta_\ell^2 \mathbb{E} \|1 - \psi_{g,m}^{(r,k)}\|^2 \mathbb{E} \|\nabla f_m(w_g^{(r)})\|^2 + 10K^2 \eta_\ell^2 \sigma_\ell^2 \mathbb{E} \|\psi_{g,m}^{(r,k)}\|^2 \quad (78)$$

748

□

749 **Theorem D.12** (Convergence of the Global Model for Non-convex Case). *If each client's objective function*  
 750  *$f_m$  satisfies Assumptions D.2, D.3, D.4, using the learning rate  $\frac{1}{2\beta} \leq \eta_\ell \leq \min\left(\frac{1}{2\sqrt{5}\beta BK^2}, \frac{1}{\sqrt{40K^4\beta^3 B^2}}\right)$  in*  
 751 *Algorithm 2, then the following convergence holds:*

$$\begin{aligned} \frac{1}{R} \sum_{r=1}^R \mathbb{E} \|\nabla F(w_g^{(r)})\|^2 &\leq \frac{2}{\eta_\ell \mathbf{q}_0^2 R} \left[\mathbb{E} [F(w_g^{(1)})] - \mathbb{E} [F(w_g^{(R+1)})]\right] + \frac{\eta_\ell \beta \sigma_\ell^2 K}{M \mathbf{q}_0^2} \\ &\quad + 40 \frac{\mathbf{q}_1^2}{\mathbf{q}_0^2} K^4 \beta^2 \eta_\ell G^2 \left(\frac{2\beta \eta_\ell^2 - \eta_\ell}{2}\right) + 20K^3 \beta^2 \eta_\ell \sigma_\ell^2 \left(\beta \eta_\ell^2 - \frac{\eta_\ell}{2}\right). \end{aligned}$$

752 *Proof.* From the update rule stated in Equation 11, and  $\beta$ -smoothness of  $f_m$ , we have

$$F(w_g^{(r+1)}) \leq F(w_g^{(r)}) + \left\langle \nabla F(w_g^{(r)}), w_g^{(r+1)} - w_g^{(r)} \right\rangle + \frac{\beta}{2} \|w_g^{(r+1)} - w_g^{(r)}\|^2 \quad (79)$$

753 Taking expectation on both sides,

$$\mathbb{E} \left[ F(w_g^{(r+1)}) \right] \leq \mathbb{E} \left[ F(w_g^{(r)}) \right] + \mathbb{E} \left[ \left\langle \nabla F(w_g^{(r)}), w_g^{(r+1)} - w_g^{(r)} \right\rangle \right] + \frac{\beta}{2} \|w_g^{(r+1)} - w_g^{(r)}\|^2 \quad (80)$$

754 Using Equation 10 for second and third terms, and using the fact that the expectation is with respect to the choice  
755 of  $h_m$ ,

$$\begin{aligned} &\leq \mathbb{E} \left[ F(w_g^{(r)}) \right] - \eta_\ell \left\langle \nabla F(w_g^{(r)}), \frac{1}{M} \sum_{m \in [M]} \alpha_m \sum_{k=1}^K \mathbb{E} \left[ h_m(w_{p,m}^{(r,k-1)}) \right] \right\rangle \\ &\quad + \frac{\beta \eta_\ell^2}{2} \mathbb{E} \left\| \frac{1}{M} \sum_{m \in [M]} \alpha_m \sum_{k=1}^K h_m(w_{p,m}^{(r,k-1)}) \right\|^2, \end{aligned} \quad (81)$$

756 where  $\alpha_m = \frac{n_m}{n}$ , which are the weights for weighted aggregation according to the sample count, as shown in  
757 Equation 11.

758 Separating mean and variance according to Assumption D.3,

$$\begin{aligned} \mathbb{E} \left[ F(w_g^{(r+1)}) \right] &\leq \mathbb{E} \left[ F(w_g^{(r)}) \right] - \eta_\ell \left\langle \nabla F(w_g^{(r)}), \frac{1}{M} \sum_{m \in [M]} \alpha_m \sum_{k=1}^K \mathbb{E} \left[ \nabla_{w_{g,m}^{(r,k-1)}} f_m(w_{p,m}^{(r,k-1)}) \right] \right\rangle \\ &\quad + \frac{\beta \eta_\ell^2}{2} \mathbb{E} \left[ \left\| \frac{1}{M} \sum_{m \in [M]} \alpha_m \sum_{k=1}^K \nabla_{w_{g,m}^{(r,k-1)}} f_m(w_{p,m}^{(r,k-1)}) \right\|^2 \right] + \frac{\eta_\ell^2 \beta \sigma_\ell^2 K}{2M} \end{aligned} \quad (82)$$

759 Using  $\langle a, b \rangle = -\frac{1}{2} \|a - b\|^2 + \frac{1}{2} \|a\|^2 + \frac{1}{2} \|b\|^2$ ,

$$\begin{aligned} \mathbb{E} \left[ F(w_g^{(r+1)}) \right] &\leq \mathbb{E} \left[ F(w_g^{(r)}) \right] - \eta_\ell \left[ -\frac{1}{2} \mathbb{E} \left\| \nabla F(w_g^{(r)}) - \frac{1}{M} \sum_{m \in [M]} \alpha_m \sum_{k=1}^K \nabla_{w_{g,m}^{(r,k-1)}} f_m(w_{p,m}^{(r,k-1)}) \right\|^2 \right] \\ &\quad - \eta_\ell \left[ \frac{1}{2} \mathbb{E} \left\| \nabla F(w_g^{(r)}) \right\|^2 + \frac{1}{2} \mathbb{E} \left\| \frac{1}{M} \sum_{m \in [M]} \alpha_m \sum_{k=1}^K \nabla_{w_{g,m}^{(r,k-1)}} f_m(w_{p,m}^{(r,k-1)}) \right\|^2 \right] \\ &\quad + \frac{\beta \eta_\ell^2}{2} \mathbb{E} \left[ \left\| \frac{1}{M} \sum_{m \in [M]} \alpha_m \sum_{k=1}^K \nabla_{w_{g,m}^{(r,k-1)}} f_m(w_{p,m}^{(r,k-1)}) \right\|^2 \right] + \frac{\eta_\ell^2 \beta \sigma_\ell^2 K}{2M} \end{aligned} \quad (83)$$

$$\begin{aligned} &\leq \mathbb{E} \left[ F(w_g^{(r)}) \right] - \frac{\eta_\ell}{2} \mathbb{E} \left\| \nabla F(w_g^{(r)}) \right\|^2 \\ &\quad - \left( \frac{\eta_\ell}{2} - \frac{\beta \eta_\ell^2}{2} \right) \mathbb{E} \left\| \frac{1}{M} \sum_{m \in [M]} \alpha_m \sum_{k=1}^K \nabla_{w_{g,m}^{(r,k-1)}} f_m(w_{p,m}^{(r,k-1)}) \right\|^2 \\ &\quad + \frac{\eta_\ell}{2} \mathbb{E} \left\| \nabla F(w_g^{(r)}) - \frac{1}{M} \sum_{m \in [M]} \alpha_m \sum_{k=1}^K \nabla_{w_{g,m}^{(r,k-1)}} f_m(w_{p,m}^{(r,k-1)}) \right\|^2 + \frac{\eta_\ell^2 \beta \sigma_\ell^2 K}{2M} \end{aligned} \quad (84)$$

(85)

$$\begin{aligned}
&\leq \mathbb{E} \left[ F(w_g^{(r)}) \right] - \frac{\eta_\ell}{2} \mathbb{E} \left\| \nabla F(w_g^{(r)}) \right\|^2 \\
&\quad - \left( \frac{\eta_\ell}{2} - \frac{\beta \eta_\ell^2}{2} \right) \mathbb{E} \left\| \nabla F(w_g^{(r)}) - \frac{1}{M} \sum_{m \in [M]} \alpha_m \sum_{k=1}^K \nabla_{w_{g,m}^{(r,k-1)}} f_m(w_{p,m}^{(r,k-1)}) - \nabla F(w_g^{(r)}) \right\|^2 \\
&\quad + \frac{\eta_\ell}{2} \mathbb{E} \left\| \nabla F(w_g^{(r)}) - \frac{1}{M} \sum_{m \in [M]} \alpha_m \sum_{k=1}^K \nabla_{w_{g,m}^{(r,k-1)}} f_m(w_{p,m}^{(r,k-1)}) \right\|^2 + \frac{\eta_\ell^2 \beta \sigma_\ell^2 K}{2M} \tag{86}
\end{aligned}$$

$$\begin{aligned}
&\leq \mathbb{E} \left[ F(w_g^{(r)}) \right] - \left( \frac{3\eta_\ell}{2} - \beta \eta_\ell^2 \right) \mathbb{E} \left\| \nabla F(w_g^{(r)}) \right\|^2 + \frac{\eta_\ell^2 \beta \sigma_\ell^2 K}{2M} \\
&\quad - \left( \frac{\eta_\ell}{2} - \beta \eta_\ell^2 \right) \mathbb{E} \left\| \nabla F(w_g^{(r)}) - \frac{1}{M} \sum_{m \in [M]} \alpha_m \sum_{k=1}^K \nabla_{w_{g,m}^{(r,k-1)}} f_m(w_{p,m}^{(r,k-1)}) \right\|^2 \tag{87}
\end{aligned}$$

$$\begin{aligned}
&\leq \mathbb{E} \left[ F(w_g^{(r)}) \right] - \left( \frac{3\eta_\ell}{2} - \beta \eta_\ell^2 \right) \mathbb{E} \left\| \nabla F(w_g^{(r)}) \right\|^2 + \frac{\eta_\ell^2 \beta \sigma_\ell^2 K}{2M} \\
&\quad - \left( \frac{\eta_\ell}{2} - \beta \eta_\ell^2 \right) \beta^2 K \cdot \frac{1}{M} \sum_{m \in [M]} \alpha_m \sum_{k=1}^K \mathbb{E} \left\| w_g^{(r)} - w_{p,m}^{(r,k-1)} \right\|^2 \tag{88}
\end{aligned}$$

761 Using Lemma D.11,

$$\begin{aligned}
\mathbb{E} \left[ F(w_g^{(r+1)}) \right] &\leq \mathbb{E} \left[ F(w_g^{(r)}) \right] - \left( \frac{3\eta_\ell}{2} - \beta \eta_\ell^2 \right) \mathbb{E} \left\| \nabla F(w_g^{(r)}) \right\|^2 + \frac{\eta_\ell^2 \beta \sigma_\ell^2 K}{2M} \\
&\quad - \left( \frac{\eta_\ell}{2} - \beta \eta_\ell^2 \right) \beta^2 K \cdot \frac{1}{M} \sum_{m \in [M]} \alpha_m \sum_{k=1}^K \left( 20K^3 \eta_\ell^2 \mathbb{E} \|1 - \psi_{g,m}^{(r,k)}\|^2 \mathbb{E} \|\nabla f_m(w_g^{(r)})\|^2 \right. \\
&\quad \left. + 10K^2 \eta_\ell^2 \sigma_\ell^2 \mathbb{E} \|\psi_{g,m}^{(r,k)}\|^2 \right) \tag{89}
\end{aligned}$$

762 Using Assumption D.4 for non-convex case, we get,

$$\begin{aligned}
\mathbb{E} \left[ F(w_g^{(r+1)}) \right] &\leq \mathbb{E} \left[ F(w_g^{(r)}) \right] - \left( \frac{3\eta_\ell}{2} - \beta \eta_\ell^2 \right) \mathbb{E} \left\| \nabla F(w_g^{(r)}) \right\|^2 + \frac{\eta_\ell^2 \beta \sigma_\ell^2 K}{2M} \\
&\quad - \left( \frac{\eta_\ell}{2} - \beta \eta_\ell^2 \right) 20\beta^2 K^4 \eta_\ell^2 (G^2 + B^2 \mathbb{E} \|\nabla F(w_g^{(r)})\|^2) \mathbb{E} \|1 - \psi_g^{(r)}\|^2 \\
&\quad - \left( \frac{\eta_\ell}{2} - \beta \eta_\ell^2 \right) \left( 10\beta^2 K^3 \eta_\ell^2 \sigma_\ell^2 \mathbb{E} \|\psi_g^{(r)}\|^2 \right) \tag{90}
\end{aligned}$$

763 Rearranging the terms to put  $\mathbb{E} \left\| \nabla F(w_g^{(r)}) \right\|^2$  on left-hand side,

$$\begin{aligned}
&\left( \frac{3\eta_\ell}{2} - \beta \eta_\ell^2 - 20K^4 \beta^2 \eta_\ell^2 B^2 \mathbf{q}_1^2 \left( \frac{\eta_\ell}{2} - \beta \eta_\ell^2 \right) \right) \mathbb{E} \left\| \nabla F(w_g^{(r)}) \right\|^2 \leq \mathbb{E} \left[ F(w_g^{(r)}) \right] - \mathbb{E} \left[ F(w_g^{(r+1)}) \right] \\
&\quad - 20\mathbf{q}_1^2 K^4 \beta^2 \eta_\ell^2 G^2 \left( \frac{\eta_\ell}{2} - \beta \eta_\ell^2 \right) - 10\mathbf{q}_0^2 K^3 \beta^2 \eta_\ell^2 \sigma_\ell^2 \left( \frac{\eta_\ell}{2} - \beta \eta_\ell^2 \right) + \frac{\eta_\ell^2 \beta \sigma_\ell^2 K}{2M} \tag{91}
\end{aligned}$$

764 Assuming  $10K^4 \beta^2 \eta_\ell^3 B^2 \leq \frac{\eta_\ell}{2} \implies \eta_\ell \leq \frac{1}{2\sqrt{5}\beta BK^2}$  and  $20K^4 \beta^3 \eta_\ell^4 B^2 \leq \frac{\eta_\ell}{2} \implies \eta_\ell \leq \frac{1}{\sqrt[3]{40K^4 \beta^3 B^2}}$ ,

$$\begin{aligned}
\left( \frac{\eta_\ell}{2} \right) \mathbf{q}_0^2 \mathbb{E} \left\| \nabla F(w_g^{(r)}) \right\|^2 &\leq \mathbb{E} \left[ F(w_g^{(r)}) \right] - \mathbb{E} \left[ F(w_g^{(r+1)}) \right] + \frac{\eta_\ell^2 \beta \sigma_\ell^2 K}{2M} \\
&\quad + 20\mathbf{q}_1^2 K^4 \beta^2 \eta_\ell^2 G^2 \left( \frac{2\beta \eta_\ell^2 - \eta_\ell}{2} \right) + 10\mathbf{q}_0^2 K^3 \beta^2 \eta_\ell^2 \sigma_\ell^2 \left( \beta \eta_\ell^2 - \frac{\eta_\ell}{2} \right) \tag{92}
\end{aligned}$$

$$\begin{aligned}
\mathbb{E} \left\| \nabla F(w_g^{(r)}) \right\|^2 &\leq \frac{2}{\eta_\ell \mathbf{q}_0^2} \left[ \mathbb{E} \left[ F(w_g^{(r)}) \right] - \mathbb{E} \left[ F(w_g^{(r+1)}) \right] \right] + \frac{\eta_\ell \beta \sigma_\ell^2 K}{M \mathbf{q}_0^2} \\
&\quad + 40 \frac{\mathbf{q}_1^2}{\mathbf{q}_0^2} K^4 \beta^2 \eta_\ell G^2 \left( \frac{2\beta \eta_\ell^2 - \eta_\ell}{2} \right) + 20K^3 \beta^2 \eta_\ell \sigma_\ell^2 \left( \beta \eta_\ell^2 - \frac{\eta_\ell}{2} \right) \tag{93}
\end{aligned}$$

765 Taking average over all the  $R$  rounds,

$$\begin{aligned} \frac{1}{R} \sum_{r=1}^R \mathbb{E} \left\| \nabla F(w_g^{(r)}) \right\|^2 &\leq \frac{2}{\eta_\ell \mathbf{q}_0^2 R} \left[ \mathbb{E} \left[ F(w_g^{(1)}) \right] - \mathbb{E} \left[ F(w_g^{(R+1)}) \right] \right] + \frac{\eta_\ell \beta \sigma_\ell^2 K}{M \mathbf{q}_0^2} \\ &\quad + 40 \frac{\mathbf{q}_1^2}{\mathbf{q}_0^2} K^4 \beta^2 \eta_\ell G^2 \left( \frac{2\beta \eta_\ell^2 - \eta_\ell}{2} \right) + 20K^3 \beta^2 \eta_\ell \sigma_\ell^2 \left( \beta \eta_\ell^2 - \frac{\eta_\ell}{2} \right) \end{aligned} \quad (94)$$

766

□

## 767 D.5 Convergence Proof for the Personalized Model: Convex (Strong and General) Cases

768 **Lemma D.13** (Local progress of the personalized model). *If  $m^{\text{th}}$  client's objective function  $f_m$  satisfies*  
 769 *Assumptions D.1, D.2, D.3, and D.4 and conditioning on  $\eta_\ell \leq \frac{1}{\beta \sqrt{6K}}$  in Algorithm 2, the following are satisfied:*

$$\begin{aligned} \mathbb{E} \|w_{p,m}^{(r,K)} - \tilde{w}_{p,m}^{(r,0)}\|^2 &\leq 18K^2 \eta_\ell^2 \mathbb{E} \|\nabla f_m(\tilde{w}_{p,m}^{(r,0)})\|^2 + 108K^4 \eta_\ell^4 \mathbb{E} \|\nabla f_m(w_g^{(r)})\|^2 + 126K^3 \eta_\ell^4 \sigma_\ell^2 \\ &\quad + 9K^2 \eta_\ell^2 \mathbb{E} \|\psi_{g,m}^{(r,K)}\|^2 + 144K^5 \eta_\ell^4 \mathbb{E} \|\psi_{g,m}^{(r,K)}\|^2 \mathbb{E} \|\nabla f_m(w_g^{(r)})\|^2 \end{aligned}$$

*Proof.*

$$\mathbb{E} \|w_{p,m}^{(r,K)} - \tilde{w}_{p,m}^{(r,0)}\|^2 \leq \mathbb{E} \|\psi_{g,m}^{(r,K+1)} w_{g,m}^{(r,K)} + (1 - \psi_{g,m}^{(r,K+1)}) w_{\ell,m}^{(r,K)} - \psi_{g,m}^{(r,0)} w_{g,m}^{(r,0)} - (1 - \psi_{g,m}^{(r,0)}) w_{\ell,m}^{(r,K)}\|^2 \quad (95)$$

$$\begin{aligned} &= \mathbb{E} \left\| \left( \psi_{g,m}^{(r,K)} - \eta_\ell \nabla_{\psi_{g,m}^{(r,K)}} f_m(\tilde{w}_{p,m}^{(r,K)}) \right) \left( w_{g,m}^{(r,K-1)} - \eta_\ell \nabla_{w_{g,m}^{(r,K-1)}} f_m(w_{p,m}^{(r,K-1)}) \right) \right. \\ &\quad \left. + \left( 1 - \psi_{g,m}^{(r,K)} + \eta_\ell \nabla_{\psi_{g,m}^{(r,K)}} f_m(\tilde{w}_{p,m}^{(r,K)}) \right) w_{\ell,m}^{(r,K)} - \psi_{g,m}^{(r,0)} w_{g,m}^{(r,0)} - (1 - \psi_{g,m}^{(r,0)}) w_{\ell,m}^{(r,K)} \right\|^2 \end{aligned} \quad (96)$$

$$\begin{aligned} &= \mathbb{E} \left\| \psi_{g,m}^{(r,K)} w_{g,m}^{(r,K-1)} - \psi_{g,m}^{(r,K)} \eta_\ell \nabla_{w_{g,m}^{(r,K-1)}} f_m(w_{p,m}^{(r,K-1)}) - w_{g,m}^{(r,K-1)} \eta_\ell \nabla_{\psi_{g,m}^{(r,K)}} f_m(\tilde{w}_{p,m}^{(r,K)}) \right. \\ &\quad \left. + \eta_\ell^2 \nabla_{\psi_{g,m}^{(r,K)}} f_m(\tilde{w}_{p,m}^{(r,K)}) \nabla_{w_{g,m}^{(r,K-1)}} f_m(w_{p,m}^{(r,K-1)}) + \left( 1 - \psi_{g,m}^{(r,K)} \right) w_{\ell,m}^{(r,K)} \right. \\ &\quad \left. + w_{\ell,m}^{(r,K)} \eta_\ell \nabla_{\psi_{g,m}^{(r,K)}} f_m(\tilde{w}_{p,m}^{(r,K)}) - \psi_{g,m}^{(r,0)} w_{g,m}^{(r,0)} - (1 - \psi_{g,m}^{(r,0)}) w_{\ell,m}^{(r,K)} \right\|^2 \end{aligned} \quad (97)$$

770 Using the convexity of  $f_m$ ,

$$\nabla_{w_{g,m}^{(r,k)}} f_m(w_{p,m}^{(r,k)}) = \nabla_{w_{g,m}^{(r,k)}} f_m(\psi_{g,m}^{(r,k+1)} w_{g,m}^{(r,k)} + (1 - \psi_{g,m}^{(r,k+1)}) w_{\ell,m}^{(r,k)}) \quad (98)$$

$$\leq \psi_{g,m}^{(r,k+1)} \nabla f_m(w_{g,m}^{(r,k)}) \quad (99)$$

771 and

$$\nabla_{\psi_{g,m}^{(r,k)}} f_m(\tilde{w}_{p,m}^{(r,k)}) = \nabla_{\psi_{g,m}^{(r,k)}} f_m(\psi_{g,m}^{(r,k)} [w_{g,m}^{(r,k)} - w_{\ell,m}^{(r,K)}] - w_{\ell,m}^{(r,K)}) \quad (100)$$

$$\leq (w_{g,m}^{(r,k)} - w_{\ell,m}^{(r,K)}) \nabla f_m(\psi_{g,m}^{(r,k)}) \quad (101)$$

772 we get,

$$\begin{aligned} \mathbb{E} \|w_{p,m}^{(r,K)} - \tilde{w}_{p,m}^{(r,0)}\|^2 &\leq \mathbb{E} \|\psi_{g,m}^{(r,K)} w_{g,m}^{(r,K-1)} + (1 - \psi_{g,m}^{(r,K)}) w_{\ell,m}^{(r,K)} - \psi_{g,m}^{(r,0)} w_{g,m}^{(r,0)} - (1 - \psi_{g,m}^{(r,0)}) w_{\ell,m}^{(r,K)} \\ &\quad - \eta_\ell (\psi_{g,m}^{(r,K)})^2 \nabla f_m(w_{g,m}^{(r,K-1)}) + \eta_\ell (w_{\ell,m}^{(r,K)} - w_{g,m}^{(r,K-1)})^2 \nabla f_m(w_{g,m}^{(r,K)})\|^2 \end{aligned} \quad (102)$$

$$\begin{aligned} &\leq \left( 1 + \frac{1}{K-1} \right) \mathbb{E} \|w_{p,m}^{(r,K-1)} - \tilde{w}_{p,m}^{(r,0)}\|^2 + 3K \eta_\ell^2 \mathbb{E} \|\nabla f_m(w_{p,m}^{(r,K-1)})\|^2 \\ &\quad + 3K \eta_\ell^2 \mathbb{E} \|w_{\ell,m}^{(r,K)} - w_{g,m}^{(r,K-1)}\|^2 + 3K \eta_\ell^2 \mathbb{E} \|\psi_{g,m}^{(r,K)}\|^2 \end{aligned} \quad (103)$$

773

$$\begin{aligned} &\leq \left( 1 + \frac{1}{K-1} \right) \mathbb{E} \|w_{p,m}^{(r,K-1)} - \tilde{w}_{p,m}^{(r,0)}\|^2 + 3K \eta_\ell^2 \mathbb{E} \|\nabla f_m(w_{p,m}^{(r,K-1)}) - \nabla f_m(\tilde{w}_{p,m}^{(r,0)}) + \nabla f_m(\tilde{w}_{p,m}^{(r,0)})\|^2 \\ &\quad + 6K \eta_\ell^2 \mathbb{E} \|w_{\ell,m}^{(r,K)} - w_{g,m}^{(r,0)}\|^2 + 6K \eta_\ell^2 \mathbb{E} \|w_{g,m}^{(r,0)} - w_{g,m}^{(r,K-1)}\|^2 + 3K \eta_\ell^2 \mathbb{E} \|\psi_{g,m}^{(r,K)}\|^2 \end{aligned} \quad (104)$$

774 Using Lemma D.6 and D.7, and smoothness property,

$$\begin{aligned} &\leq \left( 1 + \frac{1}{K-1} + 6K \eta_\ell^2 \beta^2 \right) \mathbb{E} \|w_{p,m}^{(r,K-1)} - \tilde{w}_{p,m}^{(r,0)}\|^2 + 6K \eta_\ell^2 \mathbb{E} \|\nabla f_m(\tilde{w}_{p,m}^{(r,0)})\|^2 \\ &\quad + 6K \eta_\ell^2 \left( 6K^2 \eta_\ell^2 \mathbb{E} \|\nabla f_m(w_{\ell,m}^{(r,0)})\|^2 + 3K \eta_\ell^2 \sigma_\ell^2 \right) + 3K \eta_\ell^2 \mathbb{E} \|\psi_{g,m}^{(r,K)}\|^2 \\ &\quad + 6K \eta_\ell^2 \left( 8K^3 \eta_\ell^2 \mathbb{E} \|\psi_{g,m}^{(r,K)}\|^2 \mathbb{E} \|\nabla f_m(w_g^{(r)})\|^2 + 4K \eta_\ell^2 \sigma_\ell^2 \right) \end{aligned} \quad (105)$$

$$\begin{aligned} \mathbb{E}\|w_{p,m}^{(r,K)} - \tilde{w}_{p,m}^{(r,0)}\|^2 &\leq \sum_{i=1}^K \left( 6K\eta_\ell^2 \mathbb{E}\|\nabla f_m(\tilde{w}_{p,m}^{(r,0)})\|^2 + 36K^3\eta_\ell^4 \mathbb{E}\|\nabla f_m(w_g^{(r)})\|^2 + 42K^2\eta_\ell^4\sigma_\ell^2 \right. \\ &\quad \left. + 3K\eta_\ell^2 \mathbb{E}\|\psi_{g,m}^{(r,K)}\|^2 + 48K^4\eta_\ell^4 \mathbb{E}\|\psi_{g,m}^{(r,K)}\|^2 \mathbb{E}\|\nabla f_m(w_g^{(r)})\|^2 \right) \left( 1 + \frac{1}{K-1} + 6K\eta_\ell^2\beta^2 \right)^i \end{aligned} \quad (106)$$

776 Assuming  $6K\eta_\ell^2\beta^2 \leq 1 \implies \eta_\ell \leq \frac{1}{\beta\sqrt{6K}}$ ,

$$\begin{aligned} \mathbb{E}\|w_{p,m}^{(r,K)} - \tilde{w}_{p,m}^{(r,0)}\|^2 &\leq 3K \left( 6K\eta_\ell^2 \mathbb{E}\|\nabla f_m(\tilde{w}_{p,m}^{(r,0)})\|^2 + 36K^3\eta_\ell^4 \mathbb{E}\|\nabla f_m(w_g^{(r)})\|^2 + 42K^2\eta_\ell^4\sigma_\ell^2 \right. \\ &\quad \left. + 3K\eta_\ell^2 \mathbb{E}\|\psi_{g,m}^{(r,K)}\|^2 + 48K^4\eta_\ell^4 \mathbb{E}\|\psi_{g,m}^{(r,K)}\|^2 \mathbb{E}\|\nabla f_m(w_g^{(r)})\|^2 \right) \end{aligned} \quad (107)$$

$$\begin{aligned} &= 18K^2\eta_\ell^2 \mathbb{E}\|\nabla f_m(\tilde{w}_{p,m}^{(r,0)})\|^2 + 108K^4\eta_\ell^4 \mathbb{E}\|\nabla f_m(w_g^{(r)})\|^2 + 126K^3\eta_\ell^4\sigma_\ell^2 \\ &\quad + 9K^2\eta_\ell^2 \mathbb{E}\|\psi_{g,m}^{(r,K)}\|^2 + 144K^5\eta_\ell^4 \mathbb{E}\|\psi_{g,m}^{(r,K)}\|^2 \mathbb{E}\|\nabla f_m(w_g^{(r)})\|^2 \end{aligned} \quad (108)$$

777  $\square$

778 **Lemma D.14** (Deviation of local parameters from the aggregated global parameters). *If  $m^{\text{th}}$  client's objective*  
779 *function  $f_m$  satisfies Assumptions D.3, D.4, in Algorithm 2, the following is satisfied:*

$$\begin{aligned} \mathbb{E}\|\tilde{w}_{p,m}^{(r+1,0)} - w_{p,m}^{(r,K)}\|^2 &\leq 18 \left( K\sigma_\ell^2\eta_\ell^2 + \left( \delta_m^\psi + \frac{\delta^\psi}{M} \right) K^2\eta_\ell^2 \right) \left( K\sigma_\ell^2\eta_\ell^2 + \left( \delta_m^{w_g} + \frac{\delta^{w_g}}{M} \right) K^2\eta_\ell^2 \right) \\ &\quad + 6(1 + \eta_\ell^2 K^2\beta^4)\eta_\ell^2 K^2 \left( K\sigma_\ell^2\eta_\ell^2 + \left( \delta_m^\psi + \frac{\delta^\psi}{M} \right) K^2\eta_\ell^2 \right) \left( G^2 + B^2 \mathbb{E}\|\nabla F(w_g^{(r)})\|^2 \right) \end{aligned}$$

780 *Proof.* Stating the aggregate rule from Algorithm 2, Lines 12, 19 and 20,

$$\begin{aligned} \mathbb{E}\|\tilde{w}_{p,m}^{(r+1,0)} - w_{p,m}^{(r,K)}\|^2 &= \mathbb{E}\left\| \frac{1}{M} \sum_{c \in [M]} \psi_{g,c}^{(r,K)} \frac{1}{M} \sum_{c \in [M]} w_{g,c}^{(r,K)} + \left( 1 - \frac{1}{M} \sum_{c \in [M]} \psi_{g,c}^{(r,K)} \right) w_{\ell,m}^{(r+1,K)} \right. \\ &\quad \left. - \psi_{g,m}^{(r,K)} w_{g,m}^{(r,K)} - \left( 1 - \psi_{g,m}^{(r,K)} \right) w_{\ell,m}^{(r,K)} \right\|^2 \end{aligned} \quad (109)$$

$$\begin{aligned} &\leq 2\mathbb{E}\left\| \frac{1}{M} \sum_{c \in [M]} \psi_{g,c}^{(r,K)} \frac{1}{M} \sum_{c \in [M]} w_{g,c}^{(r,K)} - \psi_{g,m}^{(r,K)} w_{g,m}^{(r,K)} \right\|^2 \\ &\quad + 2\mathbb{E}\left\| \left( 1 - \frac{1}{M} \sum_{c \in [M]} \psi_{g,c}^{(r,K)} \right) w_{\ell,m}^{(r+1,K)} - \left( 1 - \psi_{g,m}^{(r,K)} \right) w_{\ell,m}^{(r,K)} \right\|^2 \end{aligned} \quad (110)$$

$$\begin{aligned} &\leq 2\mathbb{E}\left\| \left( \frac{1}{M} \sum_{c \in [M]} \psi_{g,c}^{(r,K)} - \psi_{g,m}^{(r,K)} \right) \left( \frac{1}{M} \sum_{c \in [M]} w_{g,c}^{(r,K)} - w_{g,m}^{(r,K)} \right) \right\|^2 \\ &\quad + 2\mathbb{E}\left\| \left( \psi_{g,m}^{(r,K)} - \frac{1}{M} \sum_{c \in [M]} \psi_{g,c}^{(r,K)} \right) \left( w_{\ell,m}^{(r+1,K)} - w_{\ell,m}^{(r,K)} \right) \right\|^2 \end{aligned} \quad (111)$$

781 Using Lemma 8 from [29] and Lemma D.17,

$$\begin{aligned} \mathbb{E}\|\tilde{w}_{p,m}^{(r+1,0)} - w_{p,m}^{(r,K)}\|^2 &\leq 18 \left( K\sigma_\ell^2\eta_\ell^2 + \left( \delta_m^\psi + \frac{\delta^\psi}{M} \right) K^2\eta_\ell^2 \right) \left( K\sigma_\ell^2\eta_\ell^2 + \left( \delta_m^{w_g} + \frac{\delta^{w_g}}{M} \right) K^2\eta_\ell^2 \right) \\ &\quad + 6(1 + \eta_\ell^2 K^2\beta^4)\eta_\ell^2 K^2 \left( K\sigma_\ell^2\eta_\ell^2 + \left( \delta_m^\psi + \frac{\delta^\psi}{M} \right) K^2\eta_\ell^2 \right) \left( G^2 + B^2 \mathbb{E}\|\nabla F(w_g^{(r)})\|^2 \right) \end{aligned} \quad (112)$$

782  $\square$

783 **Lemma D.15** (One epoch progress of the personalized model). *If  $m^{\text{th}}$  client's objective function  $f_m$  satisfies*  
784 *Assumptions D.1, D.2, D.3, and D.4 in Algorithm 2, the following are satisfied:*

$$\mathbb{E}\|w_{p,m}^{(r,k+1)} - w_{p,m}^{(r,k)}\|^2 \leq 3\eta_\ell^2 \mathbb{E}\|\nabla f_m(w_{p,m}^{(r,k)})\|^2 + 3\eta_\ell^2 \mathbb{E}\|w_{\ell,m}^{(r,K)} - w_{g,m}^{(r,k)}\|^2 + 3\eta_\ell^2 \mathbb{E}\|\psi_{g,m}^{(r,k)}\|^2$$

785 and hence,

$$\begin{aligned} \mathbb{E}\|w_{p,m}^{(r,K)} - w_{p,m}^{(r,k)}\|^2 &\leq 6\beta\eta_\ell^2 \left( \mathbb{E}[f_m(w_{p,m}^{(r,K)})] - f(w_{p,m}^*) \right) + 3\eta_\ell^2 K \sum_{i=k}^K \mathbb{E}\|\psi_{g,m}^{(r,i)}\|^2 \\ &\quad + 36K^3 \eta_\ell^4 \mathbb{E}\|\nabla f_m(w_g^{(r)})\|^2 + 40K^2 \eta_\ell^4 \sigma_\ell^2 \\ &\quad + 48K^4 \eta_\ell^4 \mathbb{E}\|\nabla f_m(w_g^{(r)})\|^2 \sum_{i=k}^K \mathbb{E}\|\psi_{g,m}^{(r,i)}\|^2 \end{aligned}$$

*Proof.*

$$\mathbb{E}\|w_{p,m}^{(r,k+1)} - w_{p,m}^{(r,k)}\|^2 = \mathbb{E}\|\psi_{g,m}^{(r,k+1)} w_{g,m}^{(r,k+1)} + (1 - \psi_{g,m}^{(r,k+1)}) w_{\ell,m}^{(r,K)} - \psi_{g,m}^{(r,k)} w_{g,m}^{(r,k)} - (1 - \psi_{g,m}^{(r,k)}) w_{\ell,m}^{(r,K)}\|^2 \quad (113)$$

$$\begin{aligned} &= \mathbb{E}\left\| \left( \psi_{g,m}^{(r,k)} - \eta_\ell \nabla_{\psi_{g,m}^{(r,k)}} f_m(\tilde{w}_{p,m}^{(r,k)}) \right) \left( w_{g,m}^{(r,k)} - \eta_\ell \nabla_{w_{g,m}^{(r,k)}} f_m(w_{p,m}^{(r,k)}) \right) \right. \\ &\quad \left. + \left( 1 - \psi_{g,m}^{(r,k)} + \eta_\ell \nabla_{\psi_{g,m}^{(r,k)}} f_m(\tilde{w}_{p,m}^{(r,k)}) \right) w_{\ell,m}^{(r,K)} - \psi_{g,m}^{(r,k)} w_{g,m}^{(r,k)} - (1 - \psi_{g,m}^{(r,k)}) w_{\ell,m}^{(r,K)} \right\|^2 \quad (114) \end{aligned}$$

$$\begin{aligned} &= \mathbb{E}\left\| \psi_{g,m}^{(r,k)} w_{g,m}^{(r,k)} - \eta_\ell w_{g,m}^{(r,k)} \nabla_{\psi_{g,m}^{(r,k)}} f_m(\tilde{w}_{p,m}^{(r,k)}) - \eta_\ell \psi_{g,m}^{(r,k)} \nabla_{w_{g,m}^{(r,k)}} f_m(w_{p,m}^{(r,k)}) \right. \\ &\quad \left. + \eta_\ell^2 \nabla_{\psi_{g,m}^{(r,k)}} f_m(\tilde{w}_{p,m}^{(r,k)}) \nabla_{w_{g,m}^{(r,k)}} f_m(w_{p,m}^{(r,k)}) + (1 - \psi_{g,m}^{(r,k)}) w_{\ell,m}^{(r,K)} \right. \\ &\quad \left. + \eta_\ell w_{\ell,m}^{(r,K)} \nabla_{\psi_{g,m}^{(r,k)}} f_m(\tilde{w}_{p,m}^{(r,k)}) - \psi_{g,m}^{(r,k)} w_{g,m}^{(r,k)} - (1 - \psi_{g,m}^{(r,k)}) w_{\ell,m}^{(r,K)} \right\|^2 \quad (115) \end{aligned}$$

$$= \mathbb{E}\left\| \eta_\ell \left( w_{\ell,m}^{(r,K)} - w_{g,m}^{(r,k)} \right) \nabla_{\psi_{g,m}^{(r,k)}} f_m(\tilde{w}_{p,m}^{(r,k)}) - \eta_\ell \left( \psi_{g,m}^{(r,k+1)} \right) \nabla_{w_{g,m}^{(r,k)}} f_m(w_{p,m}^{(r,k)}) \right\|^2 \quad (116)$$

786 Using,

$$\nabla_{w_{g,m}^{(r,k)}} f_m(w_{p,m}^{(r,k)}) = \nabla_{w_{g,m}^{(r,k)}} f_m(\psi_{g,m}^{(r,k+1)} w_{g,m}^{(r,k)} + (1 - \psi_{g,m}^{(r,k+1)}) w_{\ell,m}^{(r,K)}) \quad (117)$$

$$\leq \psi_{g,m}^{(r,k+1)} \nabla f_m(w_{g,m}^{(r,k)}) \quad (118)$$

787 and,

$$\nabla_{\psi_{g,m}^{(r,k)}} f_m(\tilde{w}_{p,m}^{(r,k)}) = \nabla_{\psi_{g,m}^{(r,k)}} f_m(\psi_{g,m}^{(r,k)} [w_{g,m}^{(r,k)} - w_{\ell,m}^{(r,K)}] - w_{\ell,m}^{(r,K)}) \quad (119)$$

$$\leq [w_{g,m}^{(r,k)} - w_{\ell,m}^{(r,K)}] \nabla f_m(\psi_{g,m}^{(r,k)}), \quad (120)$$

788 we get,

$$\leq \eta_\ell^2 \mathbb{E}\left\| - \left( w_{\ell,m}^{(r,K)} - w_{g,m}^{(r,k)} \right)^2 \nabla f_m(\psi_{g,m}^{(r,k)}) - \left( \psi_{g,m}^{(r,k+1)} \right)^2 \nabla f_m(w_{g,m}^{(r,k)}) \right\|^2 \quad (121)$$

$$\leq \eta_\ell^2 \mathbb{E}\|\nabla f_m(w_{p,m}^{(r,k)}) + \left( w_{\ell,m}^{(r,K)} - w_{g,m}^{(r,k)} \right) + \psi_{g,m}^{(r,k+1)}\|^2 \quad (122)$$

$$\leq 3\eta_\ell^2 \mathbb{E}\|\nabla f_m(w_{p,m}^{(r,k)})\|^2 + 3\eta_\ell^2 \mathbb{E}\|w_{\ell,m}^{(r,K)} - w_{g,m}^{(r,k)}\|^2 + 3\eta_\ell^2 \mathbb{E}\|\psi_{g,m}^{(r,k+1)}\|^2 \quad (123)$$

789 From Lemmas D.6 and D.7.

790 Summing over  $i = k$  to  $K$ ,

$$\mathbb{E}\|w_{p,m}^{(r,K)} - w_{p,m}^{(r,k)}\|^2 = \mathbb{E}\left\| \sum_{i=k}^K w_{p,m}^{(r,i+1)} - w_{p,m}^{(r,i)} \right\|^2 \quad (124)$$

$$\begin{aligned} &\leq 3\eta_\ell^2 \sum_{i=k}^K \mathbb{E}\|\nabla f_m(w_{p,m}^{(r,i)})\|^2 + 3\eta_\ell^2 K \sum_{i=k}^K \mathbb{E}\|\psi_{g,m}^{(r,i)}\|^2 \\ &\quad + 6\eta_\ell^2 \sum_{i=k}^K \left( 6K^2 \eta_\ell^2 \mathbb{E}\|\nabla f_m(w_g^{(r)})\|^2 + 3K \eta_\ell^2 \sigma_\ell^2 \right) \\ &\quad + 6\eta_\ell^2 \sum_{i=k}^K \left( 8K^3 \eta_\ell^2 \mathbb{E}\|\psi_{g,m}^{(r,i)}\|^2 \mathbb{E}\|\nabla f_m(w_g^{(r)})\|^2 + 4K \eta_\ell^2 \sigma_\ell^2 \right) \quad (125) \end{aligned}$$

$$\begin{aligned}
&\leq 6\beta\eta_\ell^2 \left( \mathbb{E}[f_m(w_{p,m}^{(r,K)})] - f(w_{p,m}^*) \right) + 3\eta_\ell^2 K \sum_{i=k}^K \mathbb{E} \|\psi_{g,m}^{(r,i)}\|^2 \\
&\quad + 36K^3 \eta_\ell^4 \mathbb{E} \|\nabla f_m(w_g^{(r)})\|^2 + 18K^2 \eta_\ell^4 \sigma_\ell^2 \\
&\quad + 48K^4 \eta_\ell^4 \mathbb{E} \|\nabla f_m(w_g^{(r)})\|^2 \sum_{i=k}^K \mathbb{E} \|\psi_{g,m}^{(r,i)}\|^2 + 24K^2 \eta_\ell^4 \sigma_\ell^2
\end{aligned} \tag{126}$$

$$\begin{aligned}
\therefore \mathbb{E} \|w_{p,m}^{(r,K)} - w_{p,m}^{(r,k)}\|^2 &\leq 6\beta\eta_\ell^2 \left( \mathbb{E}[f_m(w_{p,m}^{(r,K)})] - f(w_{p,m}^*) \right) + 3\eta_\ell^2 K \sum_{i=k}^K \mathbb{E} \|\psi_{g,m}^{(r,i)}\|^2 \\
&\quad + 36K^3 \eta_\ell^4 \mathbb{E} \|\nabla f_m(w_g^{(r)})\|^2 + 40K^2 \eta_\ell^4 \sigma_\ell^2 \\
&\quad + 48K^4 \eta_\ell^4 \mathbb{E} \|\nabla f_m(w_g^{(r)})\|^2 \sum_{i=k}^K \mathbb{E} \|\psi_{g,m}^{(r,i)}\|^2
\end{aligned} \tag{127}$$

□

794 **Theorem D.16** (Convergence of the Personalized Model for Convex (Strong and General) Cases). *If each*  
795 *client's objective function  $f_m$  satisfies Assumptions D.2, D.3, D.4, using the learning rate  $\frac{1}{\mu R} \leq \eta_\ell \leq \frac{1}{K\beta^2}$  in*  
796 *Algorithm 2, then the following convergence holds:*  
797 *(Strong Convex Case)*

$$\begin{aligned}
\mathbb{E} \left[ f_m(w_{p,m}^{(R,0)}) \right] - f_m(w_{p,m}^*) &\leq \frac{36\mu^2}{RK^3} \mathbb{E} \|w_{p,m}^{(1,K)} - w_{p,m}^*\|^2 \exp \left( \frac{1}{K-1} - \eta_\ell \mu KR \right) \\
&\quad + 12K^2 \eta_\ell^2 \delta_m^{w_g} + 12K^2 \eta_\ell^2 \frac{1}{R} \sum_{r=1}^R \mathbb{E} \|\nabla F(w_g^{(r+1)})\|^2 + 4K \eta_\ell^2 \sigma_\ell^2 + \frac{\mathbf{q}_0^2}{2} + 16K^3 \eta_\ell^2 \mathbf{q}_0^2 \delta_m^{w_g} \\
&\quad + 16K^3 \eta_\ell^2 \mathbf{q}_0^2 \frac{1}{R} \sum_{r=1}^R \mathbb{E} \|\nabla F(w_g^{(r+1)})\|^2 + \frac{K^2 \eta_\ell^2}{2} \left( \frac{\sigma_\ell^2}{K} + \left( \delta_m^\psi + \frac{\delta^\psi}{M} \right) \right) \left( \frac{\sigma_\ell^2}{K} + \left( \delta_m^{w_g} + \frac{\delta^{w_g}}{M} \right) \right) \\
&\quad + \frac{1 + \eta_\ell^2 K^2 \beta^4}{6} \left( K \sigma_\ell^2 \eta_\ell^2 + \left( \delta_m^\psi + \frac{\delta^\psi}{M} \right) K^2 \eta_\ell^2 \right) \left( \frac{2}{R} \sum_{r=1}^R \mathbb{E} \|\nabla F(w_g^{(r)})\|^2 + 2\delta_m^{w_g} \right)
\end{aligned}$$

798 *(General Convex Case)*

$$\begin{aligned}
\mathbb{E} \left[ f_m(w_{p,m}^{(R,0)}) \right] - f_m(w_{p,m}^*) &\leq \frac{1}{36\eta_\ell^2 K^2 R} \left( 1 + \frac{1}{K-1} \right) \mathbb{E} \|w_{p,m}^{(1,K)} - w_{p,m}^*\|^2 \\
&\quad + \eta_\ell^2 (12K^2 \frac{1}{R} \sum_{r=1}^R \mathbb{E} \|\nabla F(w_g^{(r)})\|^2)^{1/3} + \eta_\ell^2 (12K^2 \delta_m^{w_g})^{1/3} + \eta_\ell^2 (4K \sigma_\ell^2)^{1/3} + \frac{\mathbf{q}_0^2}{2} + \eta_\ell^2 (16K^3 \mathbf{q}_0^2 \delta_m^{w_g})^{1/3} \\
&\quad + \eta_\ell^2 (16K^3 \mathbf{q}_0^2 \frac{1}{R} \sum_{r=1}^R \mathbb{E} \|\nabla F(w_g^{(r+1)})\|^2)^{1/3} + \eta_\ell^2 \left( \frac{K^2}{2} \left( \frac{\sigma_\ell^2}{K} + \left( \delta_m^\psi + \frac{\delta^\psi}{M} \right) \right) \left( \frac{\sigma_\ell^2}{K} + \left( \delta_m^{w_g} + \frac{\delta^{w_g}}{M} \right) \right) \right)^{1/3} \\
&\quad + \eta_\ell^2 \left( \frac{K^2}{3} \left( \frac{\sigma_\ell^2}{K} + \left( \delta_m^\psi + \frac{\delta^\psi}{M} \right) \right) \left( \frac{2}{R} \sum_{r=1}^R \mathbb{E} \|\nabla F(w_g^{(r)})\|^2 + 2\delta_m^{w_g} \right) \right)^{1/3}
\end{aligned}$$

799 *where  $\frac{1}{R} \sum_{r=1}^R \mathbb{E} \|\nabla F(w_g^{(r)})\|^2$  is bounded as shown in Theorem D.12.*

800 *Proof.* We restate the update rules of the personalized model in Algorithm 2,

- 801 1. For all samples  $x_m$ , define  $\tilde{w}_{p,m}^{(r,k)}(x_m) \leftarrow \psi_{g,m}^{(r,k)}(x_m) w_{g,m}^{(r,k)}(x_m) + (1 - \psi_{g,m}^{(r,k)}(x_m)) w_{\ell,m}^{(r,K)}(x_m)$
- 802 2. Train policy parameters  $\psi_{g,m}^{(r,k+1)} \leftarrow \psi_{g,m}^{(r,k)} - \eta_\ell \nabla_{\psi_{g,m}^{(r,k)}} f_m(\tilde{w}_{p,m}^{(r,k)}(x_m), y_m)$
- 803 3. For all samples  $x_m$ , define
- 804  $w_{p,m}^{(r,k)}(x_m) \leftarrow \psi_{g,m}^{(r,k+1)}(x_m) w_{g,m}^{(r,k)}(x_m) + (1 - \psi_{g,m}^{(r,k+1)}(x_m)) w_{\ell,m}^{(r,K)}(x_m)$
- 805 4. Train global parameters  $w_{g,m}^{(r,k)} \leftarrow w_{g,m}^{(r,k-1)} - \eta_\ell \nabla_{w_{g,m}^{(r,k-1)}} f_m(w_{p,m}^{(r,k)}(x_m), y_m)$

$$\mathbb{E}\|w_{p,m}^{(r+1,K)} - w_{p,m}^*\|^2 = \mathbb{E}\|w_{p,m}^{(r+1,K)} - \tilde{w}_{p,m}^{(r+1,0)} + \tilde{w}_{p,m}^{(r+1,0)} - w_{p,m}^{(r,K)} + w_{p,m}^{(r,K)} - w_{p,m}^*\|^2 \quad (128)$$

$$\begin{aligned} &\leq 2K \underbrace{\mathbb{E}\|w_{p,m}^{(r+1,K)} - \tilde{w}_{p,m}^{(r+1,0)}\|^2}_{\text{Lemma D.13}} + 2K \underbrace{\mathbb{E}\|\tilde{w}_{p,m}^{(r+1,0)} - w_{p,m}^{(r,K)}\|^2}_{\text{Lemma D.14}} \\ &\quad + \left(1 + \frac{1}{K-1}\right) \mathbb{E}\|w_{p,m}^{(r,K)} - w_{p,m}^*\|^2 \end{aligned} \quad (129)$$

806 And using Assumption D.4,

$$\begin{aligned} &\leq 36K^2\eta_\ell^2 \left[ f_m(w_{p,m}^*) - \mathbb{E} \left[ f_m(w_{p,m}^{(r+1,0)}) \right] \right] + 216K^4\eta_\ell^4 \mathbb{E}\|\nabla f_m(w_g^{(r+1)})\|^2 + 126K^3\eta_\ell^4\sigma_\ell^2 \\ &\quad + 18K^2\eta_\ell^2 \mathbb{E}\|\psi_{g,m}^{(r+1,K)}\|^2 + 288K^5\eta_\ell^4 \mathbb{E}\|\psi_{g,m}^{(r+1,K)}\|^2 \mathbb{E}\|\nabla f_m(w_g^{(r+1)})\|^2 \\ &\quad + 18 \left( K\sigma_\ell^2\eta_\ell^2 + \left( \delta_m^\psi + \frac{\delta^\psi}{M} \right) K^2\eta_\ell^2 \right) \left( K\sigma_\ell^2\eta_\ell^2 + \left( \delta_m^{w_g} + \frac{\delta^{w_g}}{M} \right) K^2\eta_\ell^2 \right) \\ &\quad + 6(1 + \eta_\ell^2 K^2 \beta^4) \eta_\ell^2 K^2 \left( K\sigma_\ell^2\eta_\ell^2 + \left( \delta_m^\psi + \frac{\delta^\psi}{M} \right) K^2\eta_\ell^2 \right) \mathbb{E}\|\nabla f_m(w_g^{(r)})\|^2 \\ &\quad + \left( 1 + \frac{1}{K-1} - \mu\eta_\ell \right) \mathbb{E}\|w_{p,m}^{(r,K)} - w_{p,m}^*\|^2 \end{aligned} \quad (130)$$

807 Rearranging the terms,

$$\begin{aligned} 36K^2\eta_\ell^2 \left[ \mathbb{E} \left[ f_m(w_{p,m}^{(r+1,0)}) \right] - f_m(w_{p,m}^*) \right] &\leq \left( 1 + \frac{1}{K-1} - \mu\eta_\ell \right) \mathbb{E}\|w_{p,m}^{(r,K)} - w_{p,m}^*\|^2 - \mathbb{E}\|w_{p,m}^{(r,K+1)} - w_{p,m}^*\|^2 \\ &\quad + 216K^4\eta_\ell^4 \mathbb{E}\|\nabla f_m(w_g^{(r+1)})\|^2 + 126K^3\eta_\ell^4\sigma_\ell^2 + 18K^2\eta_\ell^2 \mathbb{E}\|\psi_{g,m}^{(r+1,K)}\|^2 \\ &\quad + 288K^5\eta_\ell^4 \mathbb{E}\|\psi_{g,m}^{(r+1,K)}\|^2 \mathbb{E}\|\nabla f_m(w_g^{(r+1)})\|^2 \\ &\quad + 18 \left( K\sigma_\ell^2\eta_\ell^2 + \left( \delta_m^\psi + \frac{\delta^\psi}{M} \right) K^2\eta_\ell^2 \right) \left( K\sigma_\ell^2\eta_\ell^2 + \left( \delta_m^{w_g} + \frac{\delta^{w_g}}{M} \right) K^2\eta_\ell^2 \right) \\ &\quad + 6(1 + \eta_\ell^2 K^2 \beta^4) \eta_\ell^2 K^2 \left( K\sigma_\ell^2\eta_\ell^2 + \left( \delta_m^\psi + \frac{\delta^\psi}{M} \right) K^2\eta_\ell^2 \right) \mathbb{E}\|\nabla f_m(w_g^{(r)})\|^2 \end{aligned} \quad (131)$$

808

$$\begin{aligned} \therefore \mathbb{E} \left[ f_m(w_{p,m}^{(r+1,0)}) \right] - f_m(w_{p,m}^*) &\leq \frac{1}{36\eta_\ell^2 K^2} \left( 1 + \frac{1}{K-1} - \mu\eta_\ell \right) \mathbb{E}\|w_{p,m}^{(r,K)} - w_{p,m}^*\|^2 - \frac{1}{36\eta_\ell^2 K^2} \mathbb{E}\|w_{p,m}^{(r,K+1)} - w_{p,m}^*\|^2 \\ &\quad + 6K^2\eta_\ell^2 \mathbb{E}\|\nabla f_m(w_g^{(r+1)})\|^2 + 4K\eta_\ell^2\sigma_\ell^2 + \frac{1}{2} \mathbb{E}\|\psi_{g,m}^{(r+1,K)}\|^2 + 8K^3\eta_\ell^2 \mathbb{E}\|\psi_{g,m}^{(r+1,K)}\|^2 \mathbb{E}\|\nabla f_m(w_g^{(r+1)})\|^2 \\ &\quad + \frac{K^2\eta_\ell^2}{2} \left( \frac{\sigma_\ell^2}{K} + \left( \delta_m^\psi + \frac{\delta^\psi}{M} \right) \right) \left( \frac{\sigma_\ell^2}{K} + \left( \delta_m^{w_g} + \frac{\delta^{w_g}}{M} \right) \right) \\ &\quad + \frac{1 + \eta_\ell^2 K^2 \beta^4}{6} \left( K\sigma_\ell^2\eta_\ell^2 + \left( \delta_m^\psi + \frac{\delta^\psi}{M} \right) K^2\eta_\ell^2 \right) \mathbb{E}\|\nabla f_m(w_g^{(r)})\|^2 \end{aligned} \quad (132)$$

809 For strong convex ( $\mu > 0$ ) case, using the linear convergence rate lemma from [12] (Lemma 1) and Definition  
810 D.5,

$$\begin{aligned} \mathbb{E} \left[ f_m(w_{p,m}^{(R,0)}) \right] - f_m(w_{p,m}^*) &\leq \frac{36\mu^2}{RK^3} \mathbb{E}\|w_{p,m}^{(1,K)} - w_{p,m}^*\|^2 \exp \left( \frac{1}{K-1} - \eta_\ell \mu KR \right) \\ &\quad + 12K^2\eta_\ell^2\delta_m^{w_g} + 12K^2\eta_\ell^2 \frac{1}{R} \sum_{r=1}^R \mathbb{E}\|\nabla F(w_g^{(r+1)})\|^2 + 4K\eta_\ell^2\sigma_\ell^2 + \frac{\mathbf{q}_0^2}{2} + 16K^3\eta_\ell^2\mathbf{q}_0^2\delta_m^{w_g} \\ &\quad + 16K^3\eta_\ell^2\mathbf{q}_0^2 \frac{1}{R} \sum_{r=1}^R \mathbb{E}\|\nabla F(w_g^{(r+1)})\|^2 + \frac{K^2\eta_\ell^2}{2} \left( \frac{\sigma_\ell^2}{K} + \left( \delta_m^\psi + \frac{\delta^\psi}{M} \right) \right) \left( \frac{\sigma_\ell^2}{K} + \left( \delta_m^{w_g} + \frac{\delta^{w_g}}{M} \right) \right) \\ &\quad + \frac{1 + \eta_\ell^2 K^2 \beta^4}{6} \left( K\sigma_\ell^2\eta_\ell^2 + \left( \delta_m^\psi + \frac{\delta^\psi}{M} \right) K^2\eta_\ell^2 \right) \left( \frac{2}{R} \sum_{r=1}^R \mathbb{E}\|\nabla F(w_g^{(r)})\|^2 + 2\delta_m^{w_g} \right) \end{aligned} \quad (133)$$



811 For general convex ( $\mu = 0$ ) case, using the sublinear convergence rate lemma from [12] (Lemma 2), and  
 812 conditioning on  $\eta_\ell^2 K^2 \beta^4 \leq 1 \implies \eta_\ell \leq \frac{1}{K\beta^2}$ ,

$$\begin{aligned}
 \mathbb{E} \left[ f_m(w_{p,m}^{(R,0)}) \right] - f_m(w_{p,m}^*) &\leq \frac{1}{36\eta_\ell^2 K^2 R} \left( 1 + \frac{1}{K-1} \right) \mathbb{E} \|w_{p,m}^{(1,K)} - w_{p,m}^*\|^2 \\
 &+ \eta_\ell^2 (12K^2 \frac{1}{R} \sum_{r=1}^R \mathbb{E} \|\nabla F(w_g^{(r)})\|^2)^{1/3} + \eta_\ell^2 (12K^2 \delta_m^{w_g})^{1/3} + \eta_\ell^2 (4K\sigma_\ell^2)^{1/3} + \frac{\mathbf{q}_0^2}{2} + \eta_\ell^2 (16K^3 \mathbf{q}_0^2 \delta_m^{w_g})^{1/3} \\
 &+ \eta_\ell^2 (16K^3 \mathbf{q}_0^2 \frac{1}{R} \sum_{r=1}^R \mathbb{E} \|\nabla F(w_g^{(r+1)})\|^2)^{1/3} + \eta_\ell^2 \left( \frac{K^2}{2} \left( \frac{\sigma_\ell^2}{K} + \left( \delta_m^\psi + \frac{\delta^\psi}{M} \right) \right) \left( \frac{\sigma_\ell^2}{K} + \left( \delta_m^{w_g} + \frac{\delta^{w_g}}{M} \right) \right) \right)^{1/3} \\
 &+ \eta_\ell^2 \left( \frac{K^2}{3} \left( \frac{\sigma_\ell^2}{K} + \left( \delta_m^\psi + \frac{\delta^\psi}{M} \right) \right) \left( \frac{2}{R} \sum_{r=1}^R \mathbb{E} \|\nabla F(w_g^{(r)})\|^2 + 2\delta_m^{w_g} \right) \right)^{1/3} \tag{134}
 \end{aligned}$$

813

□

## 814 D.6 Convergence Proof for the Personalized Model: Non-convex Case

815 **Lemma D.17** (One round progress of the local model). *If  $m^{\text{th}}$  client's objective function  $f_m$  satisfies Assump-*  
 816 *tions D.3, D.4, in Algorithm 2, the following is satisfied:*

$$\mathbb{E} \|w_{\ell,m}^{(r+1,K)} - w_{\ell,m}^{(r,K)}\|^2 \leq (1 - 2\eta_\ell K\beta^2 + \eta_\ell^2 K^2 \beta^4) \eta_\ell^2 K^2 \left( G^2 + B^2 \mathbb{E} \|\nabla F(w_g^{(r)})\|^2 \right)$$

*Proof.*

$$\mathbb{E} \|w_{\ell,m}^{(r+1,K)} - w_{\ell,m}^{(r,K)}\|^2 = \mathbb{E} \|w_g^{(r+1)} - \eta_\ell \sum_{k=1}^K \nabla f_m(w_g^{(r+1)}) - w_g^{(r)} + \eta_\ell \sum_{k=1}^K \nabla f_m(w_g^{(r)})\|^2 \tag{135}$$

$$= \mathbb{E} \|w_g^{(r+1)} - w_g^{(r)} - \eta_\ell \sum_{k=1}^K [\nabla f_m(w_g^{(r+1)}) - \nabla f_m(w_g^{(r)})]\|^2 \tag{136}$$

$$\leq \mathbb{E} \|w_g^{(r+1)} - w_g^{(r)} - \eta_\ell K\beta^2 (w_g^{(r+1)} - w_g^{(r)})\|^2 \tag{137}$$

$$= \mathbb{E} \|(1 - \eta_\ell K\beta^2) (w_g^{(r+1)} - w_g^{(r)})\|^2 \tag{138}$$

$$\leq (1 - \eta_\ell K\beta^2)^2 \mathbb{E} \left\| \frac{1}{M} \sum_{c \in [M]} w_{g,m}^{(r,K)} - w_g^{(r)} \right\|^2 \tag{139}$$

$$= (1 - \eta_\ell K\beta^2)^2 \mathbb{E} \left\| \frac{1}{M} \sum_{c \in [M]} (w_g^{(r)} - \eta_\ell \sum_{k=1}^K \nabla f_m(w_g^{(r)})) - w_g^{(r)} \right\|^2 \tag{140}$$

$$= (1 - \eta_\ell K\beta^2)^2 \mathbb{E} \left\| -\frac{\eta_\ell}{M} \sum_{c \in [M]} \sum_{k=1}^K \nabla f_m(w_g^{(r)}) \right\|^2 \tag{141}$$

$$\leq (1 - \eta_\ell K\beta^2)^2 \eta_\ell^2 \mathbb{E} \left\| \frac{K}{M} \sum_{c \in [M]} \nabla f_m(w_g^{(r)}) \right\|^2 \tag{142}$$

$$\leq (1 - \eta_\ell K\beta^2)^2 \eta_\ell^2 K^2 \left( G^2 + B^2 \mathbb{E} \|\nabla F(w_g^{(r)})\|^2 \right) \tag{143}$$

$$= (1 - 2\eta_\ell K\beta^2 + \eta_\ell^2 K^2 \beta^4) \eta_\ell^2 K^2 \left( G^2 + B^2 \mathbb{E} \|\nabla F(w_g^{(r)})\|^2 \right) \tag{144}$$

817 The last inequality follows from Assumption D.4. □

818 We proceed with a lemma which binds the deviation of the personalized model  $w_p$  of an arbitrary client  $m$  over  
 819 one round, i.e.,  $w_{p,m}^{(r+1)}$  and  $w_{p,m}^{(r)}$ , for non-convex case.

820 **Lemma D.18** (Local progress of personalized model). *If  $m^{\text{th}}$  client's objective function  $f_m$  satisfies Assumptions*  
 821 *D.3, D.4, and  $\eta_\ell \leq \frac{1}{K\sqrt{12\beta(K-1)}}$ , in Algorithm 2, the following is satisfied:*

$$\begin{aligned}
 \mathbb{E} \|w_{p,m}^{(r,k+1)} - w_{p,m}^{(r,0)}\|^2 &\leq 18K^5 \eta_\ell^2 \mathbb{E} \|\nabla f_m(w_g^{(r)})\|^2 + 9K^4 \eta_\ell^2 \sigma_\ell^2 + 36K^3 \eta_\ell^2 \sigma_\ell^2 \mathbb{E} \|1 - \psi_{g,m}^{(r,k)}\|^2 \\
 &+ 24K^4 \eta_\ell^2 \mathbb{E} \|\nabla f_m(w_g^{(r)})\|^2 \mathbb{E} \|\psi_{g,m}^{(r,k)}\|^2
 \end{aligned}$$

822 *Proof.* We start with using the update rule stated for the personalized model at the beginning of Theorem D.16,

$$\mathbb{E}\|w_{p,m}^{(r,k+1)} - w_{p,m}^{(r,0)}\|^2 = \mathbb{E}\|\psi_{g,m}^{(r,k+1)} w_{g,m}^{(r,k+1)} + (1 - \psi_{g,m}^{(r,k+1)}) w_{\ell,m}^{(r,K)} - w_{p,m}^{(r,0)}\|^2 \quad (145)$$

823 Expanding by one iterate,

$$\begin{aligned} &= \mathbb{E}\left\| \left( \psi_{g,m}^{(r,k)} - \eta \ell \nabla_{\psi_{g,m}^{(r,k)}} f_m(w_{p,m}^{(r,k)}) \right) \left( w_{g,m}^{(r,k)} - \eta \ell \nabla_{w_{g,m}^{(r,k)}} f_m(w_{p,m}^{(r,k)}) \right) \right. \\ &\quad \left. + \left( 1 - \psi_{g,m}^{(r,k)} + \eta \ell \nabla_{\psi_{g,m}^{(r,k)}} f_m(w_{p,m}^{(r,k)}) \right) w_{\ell,m}^{(r,K)} - w_{p,m}^{(r,0)} \right\|^2 \end{aligned} \quad (146)$$

$$\begin{aligned} &= \mathbb{E}\left\| \psi_{g,m}^{(r,k)} w_{g,m}^{(r,k)} - w_{g,m}^{(r,k)} \eta \ell \nabla_{\psi_{g,m}^{(r,k)}} f_m(w_{p,m}^{(r,k)}) - \psi_{g,m}^{(r,k)} \eta \ell \nabla_{w_{g,m}^{(r,k)}} f_m(w_{p,m}^{(r,k)}) \right. \\ &\quad \left. + \eta \ell^2 \nabla_{\psi_{g,m}^{(r,k)}} f_m(w_{p,m}^{(r,k)}) \nabla_{w_{g,m}^{(r,k)}} f_m(w_{p,m}^{(r,k)}) + (1 - \psi_{g,m}^{(r,k)}) w_{\ell,m}^{(r,K)} \right. \\ &\quad \left. + w_{\ell,m}^{(r,K)} \eta \ell \nabla_{\psi_{g,m}^{(r,k)}} f_m(w_{p,m}^{(r,k)}) - w_{p,m}^{(r,0)} \right\|^2 \end{aligned} \quad (147)$$

$$\begin{aligned} &= \mathbb{E}\left\| w_{p,m}^{(r,k)} - w_{p,m}^{(r,0)} + (w_{\ell,m}^{(r,K)} - w_{g,m}^{(r,k)}) \eta \ell \nabla_{\psi_{g,m}^{(r,k)}} f_m(w_{p,m}^{(r,k)}) \right. \\ &\quad \left. \left( -\psi_{g,m}^{(r,k)} + \eta \ell \nabla_{\psi_{g,m}^{(r,k)}} f_m(w_{p,m}^{(r,k)}) \right) \eta \ell \nabla_{w_{g,m}^{(r,k)}} f_m(w_{p,m}^{(r,k)}) \right\|^2 \end{aligned} \quad (148)$$

$$\leq 3\mathbb{E}\|w_{p,m}^{(r,k)} - w_{p,m}^{(r,0)}\|^2 + 3\mathbb{E}\|w_{\ell,m}^{(r,K)} - w_{g,m}^{(r,k)}\|^2 + 3\eta \ell^2 \mathbb{E}\|\nabla_{w_{g,m}^{(r,k)}} f_m(w_{p,m}^{(r,k)})\|^2 \quad (149)$$

824 The inequality was derived from the fact that  $\mathbb{E}\| -\eta \ell \nabla_{\psi_{g,m}^{(r,k)}} f_m(w_{p,m}^{(r,k)}) \|^2 = \mathbb{E}\|\psi_{g,m}^{(r,k+1)} - \psi_{g,m}^{(r,k)}\|^2 \leq 1$ .

825 Unrolling the recursion across  $r \in [R]$ , then using Lemmas D.6 and D.10 and Assumption D.4,

$$\mathbb{E}\|w_{p,m}^{(r,K)} - w_{p,m}^{(r,0)}\|^2 \leq \sum_{k=1}^K \left( \left( 1 + \frac{1}{K-1} \right) \mathbb{E}\|w_{\ell,m}^{(r,K)} - w_{g,m}^{(r,k)}\|^2 + K\eta \ell^2 \mathbb{E}\|\nabla_{w_{g,m}^{(r,k)}} f_m(w_{p,m}^{(r,k)})\|^2 \right) \quad (150)$$

$$\begin{aligned} &\leq \left( 6K^4 \eta \ell^2 \mathbb{E}\|\nabla f_m(w_g^{(r)})\|^2 + 3K^3 \eta \ell^2 \sigma_\ell^2 + 12K^2 \eta \ell^2 \sigma_\ell^2 \mathbb{E}\|1 - \psi_{g,m}\|^2 \right. \\ &\quad \left. + 4 \left( 1 + \frac{1}{K-1} \right) K^3 \eta \ell^2 \mathbb{E}\|\nabla f_m(w_g^{(r)})\|^2 \mathbb{E}\|\psi_{g,m}\|^2 \right) \sum_{k=1}^K \left( 1 + \frac{1}{K-1} + 12K^2 \eta \ell^2 \beta \right)^k \end{aligned} \quad (151)$$

826 Assuming  $\frac{1}{K-1} \geq 12K^2 \eta \ell^2 \beta \implies \eta \ell \leq \frac{1}{K\sqrt{12(K-1)\beta}}$ ,

$$\begin{aligned} \mathbb{E}\|w_{p,m}^{(r,K)} - w_{p,m}^{(r,0)}\|^2 &\leq \left( 6K^4 \eta \ell^2 \mathbb{E}\|\nabla f_m(w_g^{(r)})\|^2 + 3K^3 \eta \ell^2 \sigma_\ell^2 + 12K^2 \eta \ell^2 \mathbb{E}\|1 - \psi_{g,m}^{(r,k)}\|^2 \right. \\ &\quad \left. + 4 \left( 1 + \frac{1}{K-1} \right) K^3 \eta \ell^2 \mathbb{E}\|\nabla f_m(w_g^{(r)})\|^2 \mathbb{E}\|\psi_{g,m}^{(r,k)}\|^2 \sigma_\ell^2 \right) 3K \end{aligned} \quad (152)$$

$$\begin{aligned} &= 18K^5 \eta \ell^2 \mathbb{E}\|\nabla f_m(w_g^{(r)})\|^2 + 9K^4 \eta \ell^2 \sigma_\ell^2 + 36K^3 \eta \ell^2 \sigma_\ell^2 \mathbb{E}\|1 - \psi_{g,m}^{(r,k)}\|^2 \\ &\quad + 24K^4 \eta \ell^2 \mathbb{E}\|\nabla f_m(w_g^{(r)})\|^2 \mathbb{E}\|\psi_{g,m}^{(r,k)}\|^2 \end{aligned} \quad (153)$$

827  $\square$

828 **Lemma D.19** (One round progress of personalized model). *If  $m^{\text{th}}$  client's objective function  $f_m$  satisfies*  
829 *Assumptions D.3, D.4, in Algorithm 2, the following is satisfied:*

$$\begin{aligned} \mathbb{E}\|w_{p,m}^{(r+1,K)} - w_{p,m}^{(r,K)}\|^2 &\leq 72(1 + \eta \ell^2) K^3 \eta \ell^2 \left( 5K(G^2 + B^2 \mathbb{E}\|\nabla F(w_g^{(r)})\|^2) + 12\sigma_\ell^2 \right) \\ &\quad + 36 \left( K\sigma_\ell^2 \eta \ell^2 + \left( \delta_m^\psi + \frac{\delta^\psi}{M} \right) K^2 \eta \ell^2 \right) \left( K\sigma_\ell^2 \eta \ell^2 + \left( \delta_m^{w_g} + \frac{\delta^{w_g}}{M} \right) K^2 \eta \ell^2 \right) \\ &\quad + 12(1 + \eta \ell^2 K^2 \beta^4) \eta \ell^2 K^2 \left( K\sigma_\ell^2 \eta \ell^2 + \left( \delta_m^\psi + \frac{\delta^\psi}{M} \right) K^2 \eta \ell^2 \right) \left( G^2 + B^2 \mathbb{E}\|\nabla F(w_g^{(r)})\|^2 \right) \end{aligned}$$

*Proof.*

$$\mathbb{E}\|w_{p,m}^{(r+1,K)} - w_{p,m}^{(r,K)}\|^2 = \mathbb{E}\|w_{p,m}^{(r+1,K)} - w_{p,m}^{(r+1,0)} + w_{p,m}^{(r+1,0)} - w_{p,m}^{(r,K)}\|^2 \quad (154)$$

$$\leq 2\mathbb{E}\|w_{p,m}^{(r+1,K)} - w_{p,m}^{(r+1,0)}\|^2 + 2\mathbb{E}\|w_{p,m}^{(r+1,0)} - w_{p,m}^{(r,K)}\|^2 \quad (155)$$

830 Using the Lemmas D.18 and D.14, we proceed as

$$\begin{aligned}
&\leq 72(1 + \eta_\ell^2)K^3\eta_\ell^2 \left( 5K(G^2 + B^2\mathbb{E}\|\nabla F(w_g^{(r)})\|^2) + 12\sigma_\ell^2 \right) \\
&\quad + 36 \left( K\sigma_\ell^2\eta_\ell^2 + \left( \delta_m^\psi + \frac{\delta^\psi}{M} \right) K^2\eta_\ell^2 \right) \left( K\sigma_\ell^2\eta_\ell^2 + \left( \delta_m^{w_g} + \frac{\delta^{w_g}}{M} \right) K^2\eta_\ell^2 \right) \\
&\quad + 12(1 + \eta_\ell^2 K^2 \beta^4)\eta_\ell^2 K^2 \left( K\sigma_\ell^2\eta_\ell^2 + \left( \delta_m^\psi + \frac{\delta^\psi}{M} \right) K^2\eta_\ell^2 \right) \left( G^2 + B^2\mathbb{E}\|\nabla F(w_g^{(r)})\|^2 \right) \quad (156)
\end{aligned}$$

831

□

832 **Theorem D.20** (Convergence of the Personalized Model for Non-convex Cases). *If each client's objective*  
833 *function  $f_m$  satisfies Assumptions D.2, D.3, D.4 using the learning rate  $\eta_\ell \leq \frac{1}{K\sqrt{12\beta}}$  in Algorithm 2, then the*  
834 *following convergence holds:*

$$\begin{aligned}
&\frac{1}{R} \sum_{r=1}^R \mathbb{E} \|\nabla f_m(w_{p,m}^{(r,K)})\|^2 \leq \frac{2}{R} \left( \mathbb{E} [f_m(w_{p,m}^{(1,K)})] - \mathbb{E} [f_m(w_{p,m}^{(R,K)})] \right) \\
&\quad + 6(1 + \eta_\ell^2)K \left( 5K(G^2 + B^2 \frac{1}{R} \sum_{r=1}^R \mathbb{E} \|\nabla F(w_g^{(r)})\|^2) + 12\sigma_\ell^2 \right) \\
&\quad + 3K\eta_\ell^2 \left( \sigma_\ell^2 + \left( \delta_m^\psi + \frac{\delta^\psi}{M} \right) K \right) \left( \sigma_\ell^2 + \left( \delta_m^{w_g} + \frac{\delta^{w_g}}{M} \right) K \right) \\
&\quad + (1 + \eta_\ell^2 K^2 \beta^4)\eta_\ell^2 K \left( \sigma_\ell^2 + \left( \delta_m^\psi + \frac{\delta^\psi}{M} \right) K \right) \left( G^2 + B^2 \frac{1}{R} \sum_{r=1}^R \mathbb{E} \|\nabla F(w_g^{(r)})\|^2 \right)
\end{aligned}$$

835 *Proof.* According to the update rule of Equation 10 and  $\beta$ -smoothness of  $f_m$ , we have,

$$f_m(w_{p,m}^{(r+1,K)}) \leq f_m(w_{p,m}^{(r,K)}) + \left\langle \nabla f_m(w_{p,m}^{(r,K)}), w_{p,m}^{(r+1,K)} - w_{p,m}^{(r,K)} \right\rangle + \frac{\beta}{2} \|w_{p,m}^{(r+1,K)} - w_{p,m}^{(r,K)}\|^2 \quad (157)$$

836 Taking expectation on both sides,

$$\mathbb{E} [f_m(w_{p,m}^{(r+1,K)})] \leq \mathbb{E} [f_m(w_{p,m}^{(r,K)})] + \mathbb{E} \left\langle \nabla f_m(w_{p,m}^{(r,K)}), w_{p,m}^{(r+1,K)} - w_{p,m}^{(r,K)} \right\rangle + \frac{\beta}{2} \mathbb{E} \|w_{p,m}^{(r+1,K)} - w_{p,m}^{(r,K)}\|^2 \quad (158)$$

837 Using  $\langle a, b \rangle = \frac{1}{2} \|a\|^2 + \frac{1}{2} \|b\|^2 - \frac{1}{2} \|a - b\|^2$

$$\begin{aligned}
\mathbb{E} [f_m(w_{p,m}^{(r+1,K)})] &\leq \mathbb{E} [f_m(w_{p,m}^{(r,K)})] + \frac{1}{2} \mathbb{E} \|\nabla f_m(w_{p,m}^{(r,K)})\|^2 + \left( \frac{\beta + 1}{2} \right) \mathbb{E} \|w_{p,m}^{(r+1,K)} - w_{p,m}^{(r,K)}\|^2 \\
&\quad - \frac{1}{2} \mathbb{E} \|\nabla f_m(w_{p,m}^{(r,K)}) - (w_{p,m}^{(r+1,K)} - w_{p,m}^{(r,K)})\|^2 \quad (159)
\end{aligned}$$

$$\begin{aligned}
&\leq \mathbb{E} [f_m(w_{p,m}^{(r,K)})] + \frac{1}{2} \mathbb{E} \|\nabla f_m(w_{p,m}^{(r,K)})\|^2 + \left( \frac{\beta + 1}{2} \right) \mathbb{E} \|w_{p,m}^{(r+1,K)} - w_{p,m}^{(r,K)}\|^2 \\
&\quad - \mathbb{E} \|\nabla f_m(w_{p,m}^{(r,K)})\|^2 - \mathbb{E} \|(w_{p,m}^{(r+1,K)} - w_{p,m}^{(r,K)})\|^2 \quad (160)
\end{aligned}$$

$$\begin{aligned}
&\leq \mathbb{E} [f_m(w_{p,m}^{(r,K)})] - \frac{1}{2} \mathbb{E} \|\nabla f_m(w_{p,m}^{(r,K)})\|^2 + \left( \frac{\beta - 1}{2} \right) \mathbb{E} \|w_{p,m}^{(r+1,K)} - w_{p,m}^{(r,K)}\|^2 \quad (161)
\end{aligned}$$

$$(162)$$

838 Rearranging the terms to put  $\frac{1}{2}\mathbb{E}\|\nabla f_m(w_{p,m}^{(r,K)})\|^2$  at LHS,

$$\frac{1}{2}\mathbb{E}\|\nabla f_m(w_{p,m}^{(r,K)})\|^2 \leq \mathbb{E}\left[f_m(w_{p,m}^{(r,K)})\right] - \mathbb{E}\left[f_m(w_{p,m}^{(r+1,K)})\right] + \underbrace{\left(\frac{\beta-1}{2}\right)\mathbb{E}\|w_{p,m}^{(r+1,K)} - w_{p,m}^{(r,K)}\|^2}_{\text{Lemma D.19}} \quad (163)$$

$$\begin{aligned} \mathbb{E}\|\nabla f_m(w_{p,m}^{(r,K)})\|^2 &\leq 2\left(\mathbb{E}\left[f_m(w_{p,m}^{(r,K)})\right] - \mathbb{E}\left[f_m(w_{p,m}^{(r+1,K)})\right]\right) \\ &\quad + 72\beta(1 + \eta_\ell^2)K^3\eta_\ell^2\left(5K(G^2 + B^2\mathbb{E}\|\nabla F(w_g^{(r)})\|^2) + 12\sigma_\ell^2\right) \\ &\quad + 36\beta\left(K\sigma_\ell^2\eta_\ell^2 + \left(\delta_m^\psi + \frac{\delta^\psi}{M}\right)K^2\eta_\ell^2\right)\left(K\sigma_\ell^2\eta_\ell^2 + \left(\delta_m^{w_g} + \frac{\delta^{w_g}}{M}\right)K^2\eta_\ell^2\right) \\ &\quad + 12\beta(1 + \eta_\ell^2K^2\beta^4)\eta_\ell^2K^2\left(K\sigma_\ell^2\eta_\ell^2 + \left(\delta_m^\psi + \frac{\delta^\psi}{M}\right)K^2\eta_\ell^2\right)\left(G^2 + B^2\mathbb{E}\|\nabla F(w_g^{(r)})\|^2\right) \end{aligned} \quad (164)$$

839 Taking an average over all the rounds  $r \in [R]$ ,

$$\begin{aligned} \frac{1}{R}\sum_{r=1}^R\mathbb{E}\|\nabla f_m(w_{p,m}^{(r,K)})\|^2 &\leq \frac{2}{R}\left(\mathbb{E}\left[f_m(w_{p,m}^{(1,K)})\right] - \mathbb{E}\left[f_m(w_{p,m}^{(R,K)})\right]\right) \\ &\quad + 72\beta(1 + \eta_\ell^2)K^3\eta_\ell^2\left(5K(G^2 + B^2\frac{1}{R}\sum_{r=1}^R\mathbb{E}\|\nabla F(w_g^{(r)})\|^2) + 12\sigma_\ell^2\right) \\ &\quad + 36\beta K^2\eta_\ell^4\left(\sigma_\ell^2 + \left(\delta_m^\psi + \frac{\delta^\psi}{M}\right)K\right)\left(\sigma_\ell^2 + \left(\delta_m^{w_g} + \frac{\delta^{w_g}}{M}\right)K\right) \\ &\quad + 12\beta(1 + \eta_\ell^2K^2\beta^4)\eta_\ell^4K^3\left(\sigma_\ell^2 + \left(\delta_m^\psi + \frac{\delta^\psi}{M}\right)K\right)\left(G^2 + B^2\frac{1}{R}\sum_{r=1}^R\mathbb{E}\|\nabla F(w_g^{(r)})\|^2\right) \end{aligned} \quad (165)$$

840 Assuming  $12K^2\eta_\ell^2\beta \leq 1 \leq 1 \implies \eta_\ell \leq \frac{1}{K\sqrt{12\beta}}$ ,

$$\begin{aligned} \frac{1}{R}\sum_{r=1}^R\mathbb{E}\|\nabla f_m(w_{p,m}^{(r,K)})\|^2 &\leq \frac{2}{R}\left(\mathbb{E}\left[f_m(w_{p,m}^{(1,K)})\right] - \mathbb{E}\left[f_m(w_{p,m}^{(R,K)})\right]\right) \\ &\quad + 6(1 + \eta_\ell^2)K\left(5K(G^2 + B^2\frac{1}{R}\sum_{r=1}^R\mathbb{E}\|\nabla F(w_g^{(r)})\|^2) + 12\sigma_\ell^2\right) \\ &\quad + 3K\eta_\ell^2\left(\sigma_\ell^2 + \left(\delta_m^\psi + \frac{\delta^\psi}{M}\right)K\right)\left(\sigma_\ell^2 + \left(\delta_m^{w_g} + \frac{\delta^{w_g}}{M}\right)K\right) \\ &\quad + (1 + \eta_\ell^2K^2\beta^4)\eta_\ell^2K\left(\sigma_\ell^2 + \left(\delta_m^\psi + \frac{\delta^\psi}{M}\right)K\right)\left(G^2 + B^2\frac{1}{R}\sum_{r=1}^R\mathbb{E}\|\nabla F(w_g^{(r)})\|^2\right) \end{aligned} \quad (166)$$

841 Plugging in Theorem D.12 to get bounds on  $\sum_{r=1}^R\mathbb{E}\|\nabla F(w_g^{(r)})\|^2$  would get us bounds on

842  $\frac{1}{R}\sum_{r=1}^R\mathbb{E}\|\nabla f_m(w_{p,m}^{(r,K)})\|^2$ .  $\square$
